# Supplementary material for: High-throughput materials screening algorithm based on first-principles density functional theory and artificial neural network for high-entropy alloys
Source: PubMed Central journal article supplement (PMC9534987; doi:10.1038/s41598-022-21209-0), 2022-10-05
Supplement: 41598_2022_21209_MOESM1_ESM.pdf [file 41598_2022_21209_MOESM1_ESM.pdf]

## Supporting Information

### High-throughput materials screening algorithm based on first-principles density functional theory and artificial neuron network for high-entropy alloys

Meena Rittirum<sup>1,2,3</sup>, Jakapob Noppakhun<sup>1,2,3</sup>, Sorawee Setasuban<sup>1,2,4</sup>,  
Nuttanon Aumnongpho<sup>1,2,3</sup>, Attachai Sriwattana<sup>1,2,4</sup>, Suphawich Boonchuay<sup>1,2,4</sup>,  
Tinnakorn Saelee<sup>1,2,4</sup>, Chanthip Wangphon<sup>1,2,4</sup>, Annop Ektarawong<sup>5,6</sup>,  
Patchanee Chammingkwan<sup>7</sup>, Toshiaki Taniike<sup>7</sup>, Supareak Prasertthdam<sup>1,2,\*</sup>,  
Piyasan Prasertthdam<sup>2</sup>

<sup>1</sup>*High-Performance Computing Unit (CECC-HCU), Center of Excellence on Catalysis and Catalytic Reaction Engineering (CECC), Chulalongkorn University, Bangkok 10330, Thailand*

<sup>2</sup>*Center of Excellence on Catalysis and Catalytic Reaction Engineering (CECC), Chulalongkorn University, Bangkok 10330, Thailand*

<sup>3</sup>*Rittirum Research Group, Chulalongkorn University, Bangkok 10330, Thailand*

<sup>4</sup>*Saelee Research Group, Chulalongkorn University, Bangkok 10330, Thailand*

<sup>5</sup>*Extreme Conditions Physics Research Laboratory and Center of Excellence in Physics of Energy Materials (CE:PEM), Department of Physics, Faculty of Science, Chulalongkorn University, Bangkok, 10330, Thailand*

<sup>6</sup>*Chula Intelligent and Complex Systems, Faculty of Science, Chulalongkorn University, Bangkok, 10330, Thailand*

<sup>7</sup>*Graduate School of Advanced Science and Technology, Japan Advanced Institute of Science and Technology, 1-1 Asahidai, Nomi, Ishikawa 923-1292, Japan*

**Corresponding author email:** [supareak.p@chula.ac.th](mailto:supareak.p@chula.ac.th) (Supareak Prasertthdam)

## Table of Contents

|                                                                  |    |
|------------------------------------------------------------------|----|
| 1. Validation of KKR-CPA method for multi-component alloys ..... | 3  |
| 2. Supporting results .....                                      | 6  |
| References .....                                                 | 21 |

## List of Supporting Tables

|                                                                                                                                                                                                                                                                                                                                                                                           |   |
|-------------------------------------------------------------------------------------------------------------------------------------------------------------------------------------------------------------------------------------------------------------------------------------------------------------------------------------------------------------------------------------------|---|
| <b>Table S1</b> Enthalpy of formation energy ( $\Delta H_f$ ) in eV/atom and lattice parameters in Å of NbMoTaWV calculated by DFT+SQS and KKR-CPA method .....                                                                                                                                                                                                                           | 4 |
| <b>Table S2</b> Enthalpy of formation energy ( $\Delta H_f$ ) in eV/atom of various alloys calculated by KKR-CPA method. ....                                                                                                                                                                                                                                                             | 5 |
| <b>Table S3</b> Compared lattice parameters and enthalpy of formation energy ( $\Delta H_f$ ). These HEAs are PtPdCrXY (X and Y = Sc, Ti, V, Mn, Zn, Y, Nb, Tc, Cd, Hf, Ta, Re, Hg, Al, Si, P, Ga, Ge, As, Sb, Te, Pb), PtPdNiSnX (X = Sc, Ti, V, Mn, Zn, Y, Nb, Tc, Cd, Hf, Ta, Re, Hg, Al, Si, P, Ga, Ge, As, Sb, Te, Pb), and PtPdXYZ (X, Y, and Z = Sc, Ti, V, Mn, Zn, Al, Si, Sb)... | 9 |

## List of Supporting Figures

|                                                                                                                                                                                |   |
|--------------------------------------------------------------------------------------------------------------------------------------------------------------------------------|---|
| <b>Figure S1</b> Heat-map Pearson correlation coefficient of features for $\Delta H_f$ (BCC) of HEAs. ....                                                                     | 6 |
| <b>Figure S2</b> Heat-map Pearson correlation coefficient of features for $a$ (FCC) of PtPd-based HEAs .....                                                                   | 6 |
| <b>Figure S3</b> Heat-map Pearson correlation coefficient of features for $a$ (BCC) of PtPd-based HEAs .....                                                                   | 7 |
| <b>Figure S4</b> Distribution of DFT-calculated results for (a) $a$ (FCC), (b) $a$ (BCC), (c) $\Delta H_f$ (FCC), and (d) $\Delta H_f$ (BCC) for individual compositions ..... | 7 |
| <b>Figure S5</b> Distribution of ML-predicted results for (a) $a$ (FCC), (b) $a$ (BCC), (c) $\Delta H_f$ (FCC), and (d) $\Delta H_f$ (BCC) for individual compositions .....   | 8 |

## 1. Validation of KKR-CPA method for multi-component alloys

Troparevsky *et al.* [1] demonstrated that the KKR-CPA method provided accurate results for multi-component alloys. The fcc CrFeCoNi supercell with 2,048 atoms was calculated by the locally self-consistent multiple scattering (LSMS) method. The calculated magnetic moments of the KKR-CPA are closed to that of the LSMS method. Hu *et al.* experimentally prepared NbMoTaWV high-entropy alloy (HEA) using vacuum arc melting, which obtained BCC structure from the X-ray diffraction result [2]. The formation energy and lattice parameters were calculated using the density functional theory to validate the HEA containing five elements. The authors [2] designed the HEA model using a special quasi-random supercell (SQS) method. Our calculation is based on the KKR-CPA method through the Akai-KKR (Machikaneyama) package [3, 4], where the computational details are revealed in section 2 of this paper. As shown in **Table S1**, the KKR-CPA method provided the calculation results close to the experimental data [2]. In addition, the enthalpy of formation energy ( $\Delta H_f$ ) via KKR-CPA is the same trend that results via the SQS method. The BCC structure showed the lowest  $\Delta H_f$  which is the thermodynamically stable phase of the NbMoTaWV HEA. Other single-phase alloys found in literature data were used to validate the accuracy of KKR-CPA implemented in the Akai-KKR package, as shown in **Table S2**. As a result, the KKR-CPA can indicate the FCC and BCC phase stability of multi-component alloys.

**Table S1** Enthalpy of formation energy ( $\Delta H_f$ ) in eV/atom and lattice parameters in Å of NbMoTaWV calculated by DFT+SQS and KKR-CPA method.

| NbMoTaWV                | Formation energy                       | Lattice parameters                                                       |
|-------------------------|----------------------------------------|--------------------------------------------------------------------------|
| BCC                     | -0.092 (DFT+SQS)*<br>0.423 (KKR-CPA)** | a = 3.185 (experiment)*<br>a = 3.167 (DFT+SQS)*<br>a = 3.203 (KKR-CPA)** |
| FCC                     | 0.406 (DFT+SQS)*<br>1.107 (KKR-CPA)**  | -<br>a = 4.089 (KKR-CPA)**                                               |
| HCP                     | 0.563 (DFT+SQS)*<br>2.647 (KKR-CPA)**  | -<br>a = 2.780, c/a = 1.1 (KKR-CPA)**                                    |
| Experimental data (BCC) | -                                      | a = 3.185*                                                               |

\* Reference [2].

\*\* This work.

**Table S2** Enthalpy of formation energy ( $\Delta H_f$ ) in eV/atom of various alloys calculated by KKR–CPA method.

| Alloys          | $\Delta H_f$ (FCC) | $\Delta H_f$ (BCC) | Lowest $\Delta H_f$ | Phase | Reference       |
|-----------------|--------------------|--------------------|---------------------|-------|-----------------|
| CrFeCoNi        | -0.888             | -0.830             | -0.888              | FCC   | FCC [5, 6]      |
| CrFeCoNiAl      | -5.768             | -5.794             | -5.794              | BCC   | BCC [5, 7]      |
| CrFeCoNiCu      | -0.042             | 0.351              | -0.042              | FCC   | FCC [5]         |
| CrFeCoNiPd      | -1.923             | -1.847             | -1.923              | FCC   | FCC [8]         |
| CrMnCoNi        | -3.028             | -2.988             | -3.028              | FCC   | FCC [9]         |
| CrMnFeCoNi      | -0.698             | -0.653             | -0.698              | FCC   | FCC [5, 9, 10]  |
| CrMnFeCoNiCu    | -0.050             | 0.287              | -0.050              | FCC   | FCC [10]        |
| CrMnFeCoNiNb    | -0.704             | -0.431             | -0.704              | FCC   | FCC [10]        |
| CrMnFeCoNiV     | -0.949             | -0.660             | -0.949              | FCC   | FCC [10]        |
| FeCoNi          | -1.793             | -1.291             | -1.793              | FCC   | FCC [5]         |
| MnFeCoNi        | -1.297             | -1.030             | -1.297              | FCC   | FCC [5, 9]      |
| MnFeNiSiGa      | -1.906             | -2.149             | -2.149              | BCC   | BCC [5]         |
| NbMoTaW         | 0.951              | 0.302              | 0.302               | BCC   | BCC [2, 11, 12] |
| TiCrFeCoNi      | -2.814             | -2.699             | -2.814              | FCC   | FCC [5]         |
| TiVCrFeCoNiCuAl | -1.953             | -1.978             | -1.978              | BCC   | BCC [13]        |
| TiZrNbHfTa      | -5.434             | -5.671             | -5.671              | BCC   | BCC [10, 14]    |
| TiZrNbMo        | -4.066             | -4.380             | -4.380              | BCC   | BCC [7]         |
| VNbMoTaW        | 1.107              | 0.423              | 0.423               | BCC   | BCC [2, 11, 12] |

## 2. Supporting results

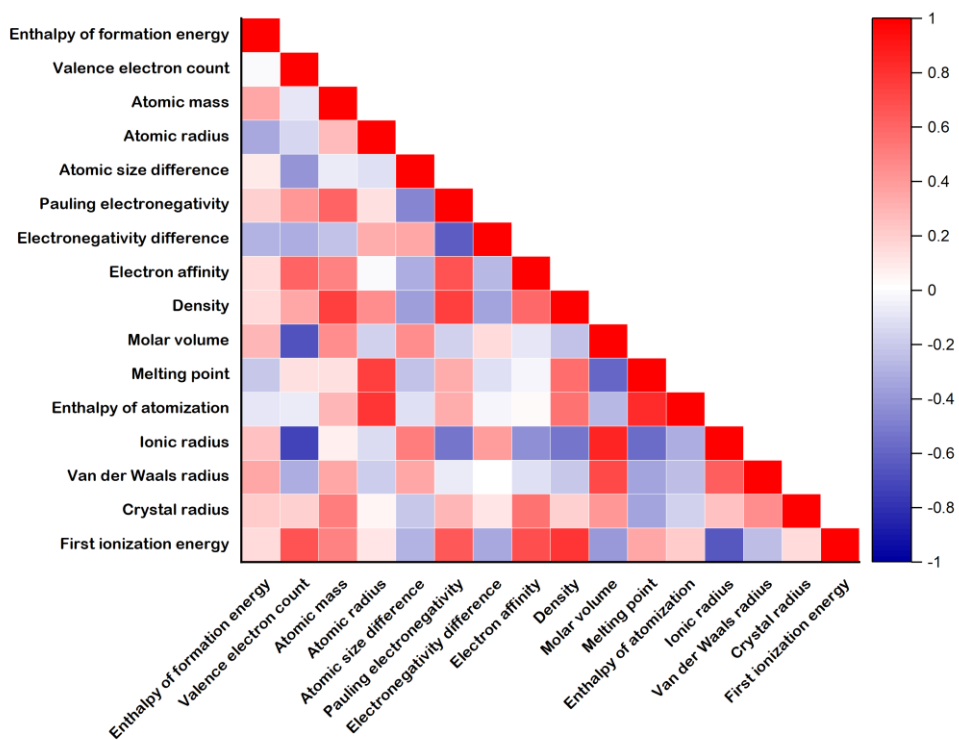

**Figure S1** Heat-map Pearson correlation coefficient of features for  $\Delta H_f(\text{BCC})$  of HEAs.

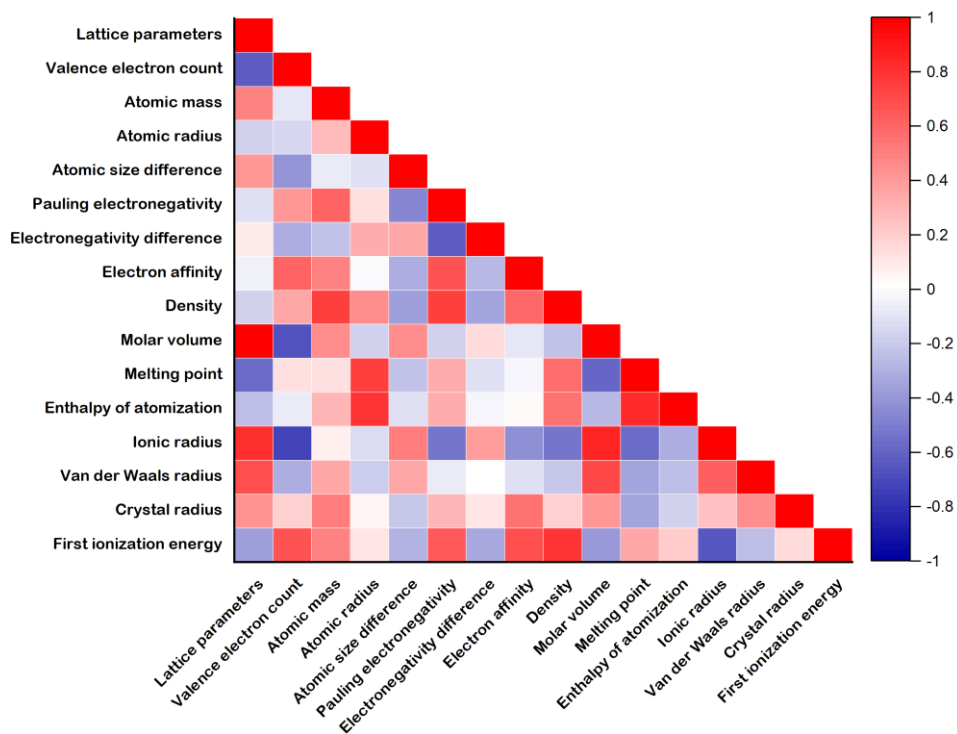

**Figure S2** Heat-map Pearson correlation coefficient of features for  $\alpha(\text{FCC})$  of PtPd-based HEAs.

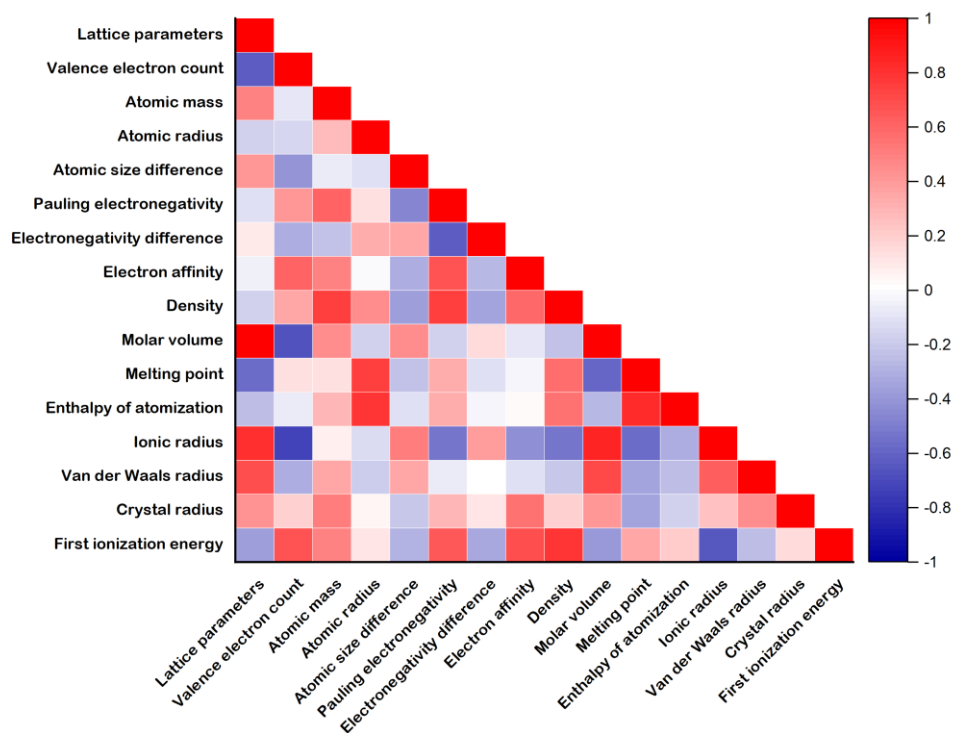

**Figure S3** Heat-map Pearson correlation coefficient of features for *a*(BCC) of PtPd-based HEAs.

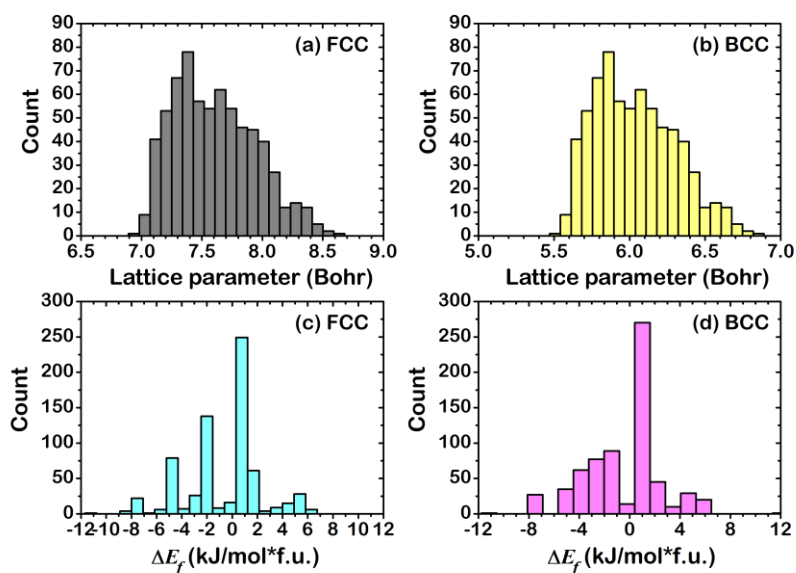

**Figure S4** Distribution of DFT-calculated results for (a) *a*(FCC), (b) *a*(BCC), (c)  $\Delta H_f$ (FCC), and (d)  $\Delta H_f$ (BCC) for individual compositions.

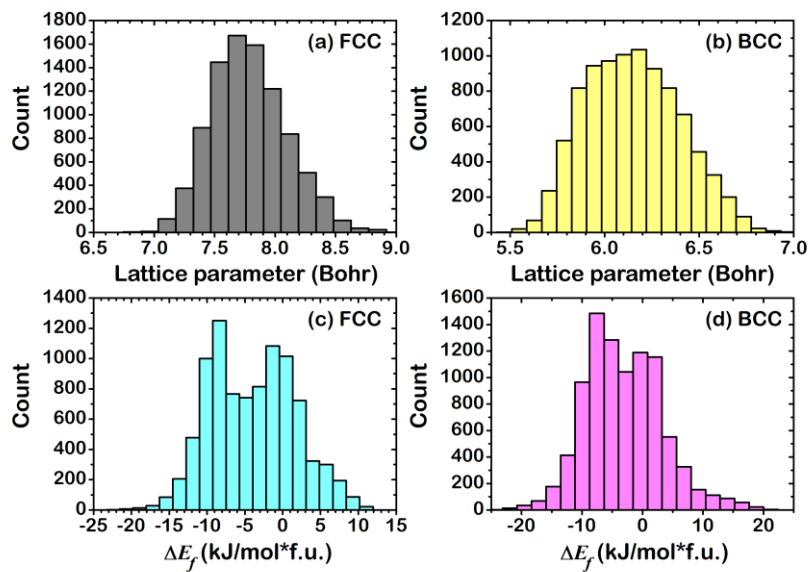

**Figure S5** Distribution of ML-predicted results for (a)  $a(\text{FCC})$ , (b)  $a(\text{BCC})$ , (c)  $\Delta H_f(\text{FCC})$ , and (d)  $\Delta H_f(\text{BCC})$  for individual compositions.



**Table S3** Compared lattice parameters and enthalpy of formation energy ( $\Delta H_f$ ). These HEAs are PtPdCrXY (X and Y = Sc, Ti, V, Mn, Zn, Y, Nb, Tc, Cd, Hf, Ta, Re, Hg, Al, Si, P, Ga, Ge, As, Sb, Te, Pb), PtPdNiSnX (X = Sc, Ti, V, Mn, Zn, Y, Nb, Tc, Cd, Hf, Ta, Re, Hg, Al, Si, P, Ga, Ge, As, Sb, Te, Pb), and PtPdXYZ (X, Y, and Z = Sc, Ti, V, Mn, Zn, Al, Si, Sb).

| HEAs       | Lattice parameters (Bohr) |        |          |        |           |           | $\Delta H_f$ (kJ/mol*f.u.) |        |          |        |           |           | Phase |     |
|------------|---------------------------|--------|----------|--------|-----------|-----------|----------------------------|--------|----------|--------|-----------|-----------|-------|-----|
|            | FCC Cal.                  | FCC ML | BCC Cal. | BCC ML | FCC error | BCC error | FCC Cal.                   | FCC ML | BCC Cal. | BCC ML | FCC error | BCC error | Cal.  | ML  |
| PtPdCrScTi | 7.557                     | 7.5023 | 5.998    | 5.9761 | 0.0547    | 0.0219    | 0.37731                    | 0.3628 | 2.8135   | 3.0582 | 0.01451   | -0.24466  | FCC   | FCC |
| PtPdCrScV  | 7.448                     | 7.3888 | 5.9115   | 5.8934 | 0.05922   | 0.01809   | 0.4526                     | 0.5453 | 3.271    | 3.5554 | -0.0927   | -0.28443  | FCC   | FCC |
| PtPdCrScMn | 7.3752                    | 7.3472 | 5.8537   | 5.8518 | 0.02803   | 0.00193   | 0.92072                    | 0.8939 | 3.8791   | 4.5106 | 0.02682   | -0.63148  | FCC   | FCC |
| PtPdCrScZn | 7.497                     | 7.4233 | 5.9504   | 5.9401 | 0.07368   | 0.01026   | -5.427                     | -4.523 | 0.7984   | 0.7604 | -0.9045   | 0.03802   | FCC   | FCC |
| PtPdCrScY  | 7.9496                    | 8.0232 | 6.3096   | 6.294  | -0.07358  | 0.01562   | -3.5014                    | -3.61  | 11.202   | 10.277 | 0.10829   | 0.924966  | FCC   | FCC |
| PtPdCrScNb | 7.6085                    | 7.5367 | 6.0388   | 5.9898 | 0.07176   | 0.04904   | -6.8036                    | -6.542 | 1.227    | 1.3943 | -0.2617   | -0.16732  | FCC   | FCC |
| PtPdCrScTc | 7.5026                    | 7.4479 | 5.9548   | 5.9299 | 0.05471   | 0.02493   | 0.74088                    | 0.9261 | 3.1039   | 3.1999 | -0.1852   | -0.096    | FCC   | FCC |
| PtPdCrScCd | 7.7399                    | 7.6051 | 6.1431   | 6.1333 | 0.13477   | 0.00984   | 3.11563                    | 2.4925 | 7.5849   | 8.3351 | 0.62313   | -0.75016  | FCC   | FCC |
| PtPdCrScHf | 7.7513                    | 7.6937 | 6.1522   | 6.1162 | 0.05763   | 0.03603   | 1.76035                    | 2.071  | 1.1587   | 1.1141 | -0.3107   | 0.044564  | BCC   | BCC |
| PtPdCrScTa | 7.6172                    | 7.5539 | 6.0458   | 5.9991 | 0.06332   | 0.04669   | 4.51757                    | 4.9104 | -2.404   | -2.478 | -0.3928   | 0.074352  | BCC   | BCC |
| PtPdCrScRe | 7.516                     | 7.4559 | 5.9654   | 5.9511 | 0.06007   | 0.01433   | 7.90104                    | 6.5842 | 2.2444   | 2.4396 | 1.31684   | -0.19517  | BCC   | BCC |
| PtPdCrScHg | 7.783                     | 7.6703 | 6.1774   | 6.2132 | 0.11273   | -0.03581  | -0.6975                    | -0.541 | 1.4509   | 1.356  | -0.1568   | 0.09492   | FCC   | FCC |
| PtPdCrScAl | 7.565                     | 7.6232 | 6.0044   | 5.8944 | -0.0582   | 0.10995   | -9.0278                    | -8.517 | -5.5526  | -5.498 | -0.511    | -0.05498  | FCC   | FCC |
| PtPdCrScGa | 7.6126                    | 7.695  | 6.0421   | 6.0333 | -0.08242  | 0.00881   | -7.1736                    | -9.197 | -3.2603  | -3.076 | 2.02332   | -0.18455  | FCC   | FCC |
| PtPdCrScTl | 7.9345                    | 8.0509 | 6.2976   | 6.3086 | -0.11644  | -0.01101  | 5.35541                    | 6.779  | 14.887   | 14.74  | -1.4236   | 0.147399  | FCC   | FCC |
| PtPdCrScSi | 7.6821                    | 7.6203 | 6.0973   | 5.8741 | 0.06177   | 0.22317   | -11.336                    | -11.45 | -8.0509  | -7.253 | 0.1145    | -0.79784  | FCC   | FCC |
| PtPdCrScGe | 7.7608                    | 7.7365 | 6.1597   | 6.0383 | 0.02426   | 0.12142   | -4.9079                    | -5.577 | -0.9386  | -1.031 | 0.66926   | 0.092826  | FCC   | FCC |
| PtPdCrScPb | 7.984                     | 8.0279 | 6.3369   | 6.3052 | -0.04391  | 0.0317    | 4.5522                     | 6.0696 | 9.7114   | 11.036 | -1.5174   | -1.32428  | FCC   | FCC |
| PtPdCrScP  | 7.7766                    | 7.6367 | 6.1723   | 6.0062 | 0.13991   | 0.1661    | -11.818                    | -11.47 | -15.065  | -15.69 | -0.3442   | 0.627696  | BCC   | BCC |
| PtPdCrScAs | 7.7269                    | 7.6008 | 6.1328   | 5.9368 | 0.12608   | 0.19603   | -7.5588                    | -9.332 | -10.42   | -9.738 | 1.77306   | -0.68169  | BCC   | BCC |
| PtPdCrScSb | 7.9812                    | 7.9378 | 6.3347   | 6.2541 | 0.04338   | 0.08057   | -2.3655                    | -2.297 | 5.4568   | 5.8675 | -0.0689   | -0.41072  | FCC   | FCC |
| PtPdCrTiV  | 7.2254                    | 7.1993 | 5.7348   | 5.7716 | 0.02612   | -0.03678  | -11.623                    | -9.686 | -7.5768  | -7.216 | -1.9372   | -0.3608   | FCC   | FCC |
| PtPdCrTiMn | 7.148                     | 7.1543 | 5.6734   | 5.7187 | -0.00629  | -0.04532  | -7.8505                    | -8.011 | -2.7743  | -3.083 | 0.16021   | 0.30825   | FCC   | FCC |
| PtPdCrTiZn | 7.2774                    | 7.2863 | 5.7761   | 5.803  | -0.00888  | -0.02691  | -9.3522                    | -7.729 | -10.738  | -9.257 | -1.6231   | -1.48104  | BCC   | BCC |

| HEAs       | Lattice parameters (Bohr) |        |          |        |           |           | $\Delta H_f$ (kJ/mol*f.u.) |        |          |        |           |           | Phase |     |
|------------|---------------------------|--------|----------|--------|-----------|-----------|----------------------------|--------|----------|--------|-----------|-----------|-------|-----|
|            | FCC Cal.                  | FCC ML | BCC Cal. | BCC ML | FCC error | BCC error | FCC Cal.                   | FCC ML | BCC Cal. | BCC ML | FCC error | BCC error | Cal.  | ML  |
| PtPdCrTiY  | 7.7553                    | 7.7712 | 6.1554   | 6.1426 | -0.0159   | 0.01279   | -5.11                      | -4.732 | 4.8941   | 5.1517 | -0.3785   | -0.25759  | FCC   | FCC |
| PtPdCrTiNb | 7.3956                    | 7.385  | 5.8699   | 5.8638 | 0.01056   | 0.00606   | -8.6698                    | -7.347 | -3.7658  | -3.843 | -1.3225   | 0.076854  | FCC   | FCC |
| PtPdCrTiTe | 7.2834                    | 7.2646 | 5.7808   | 5.8048 | 0.01879   | -0.02397  | -10.761                    | -10.25 | -7.3622  | -8.18  | -0.5124   | 0.81802   | FCC   | FCC |
| PtPdCrTiCd | 7.5344                    | 7.4503 | 5.9801   | 6.0061 | 0.08414   | -0.02601  | -1.5121                    | -1.822 | -2.9158  | -2.751 | 0.30971   | -0.16505  | BCC   | BCC |
| PtPdCrTiHf | 7.5465                    | 7.5215 | 5.9897   | 5.9926 | 0.02502   | -0.00292  | -6.39                      | -5.757 | -8.8239  | -9.488 | -0.6332   | 0.664167  | BCC   | BCC |
| PtPdCrTiTa | 7.4048                    | 7.376  | 5.8772   | 5.8762 | 0.02883   | 0.00102   | -4.0321                    | -3.804 | -7.1496  | -6.682 | -0.2282   | -0.46773  | BCC   | BCC |
| PtPdCrTiRe | 7.2976                    | 7.2687 | 5.7921   | 5.8261 | 0.02886   | -0.03402  | -4.6788                    | -4.293 | -4.7355  | -4.783 | -0.3863   | 0.047833  | BCC   | BCC |
| PtPdCrTiHg | 7.58                      | 7.5622 | 6.0162   | 6.0994 | 0.01776   | -0.08318  | -6.6319                    | -7.209 | -9.5894  | -11.15 | 0.57669   | 1.56107   | BCC   | BCC |
| PtPdCrTiAl | 7.3495                    | 7.5285 | 5.8333   | 5.723  | -0.17896  | 0.11034   | -9.6927                    | -9.32  | -9.1343  | -9.134 | -0.3728   | 0         | FCC   | FCC |
| PtPdCrTiGa | 7.3999                    | 7.5606 | 5.8733   | 5.8895 | -0.16067  | -0.01618  | -9.8074                    | -9.081 | -9.8956  | -10.2  | -0.7265   | 0.306051  | BCC   | BCC |
| PtPdCrTiTl | 7.7394                    | 7.7897 | 6.1427   | 6.172  | -0.05033  | -0.02926  | 4.5524                     | 5.99   | 12.951   | 12.697 | -1.4376   | 0.253948  | FCC   | FCC |
| PtPdCrTiSi | 7.4734                    | 7.5131 | 5.9317   | 5.7773 | -0.03969  | 0.15435   | -12.381                    | -10.96 | -9.5475  | -9.945 | -1.4244   | 0.397812  | FCC   | FCC |
| PtPdCrTiGe | 7.5565                    | 7.5525 | 5.9976   | 5.9066 | 0.00398   | 0.09098   | -10.72                     | -10.02 | -11.43   | -11.66 | -0.7013   | 0.233272  | BCC   | BCC |
| PtPdCrTiPb | 7.7914                    | 7.7884 | 6.184    | 6.1854 | 0.003     | -0.00136  | 4.94091                    | 4.223  | 3.1329   | 3.4428 | 0.71791   | -0.30985  | BCC   | BCC |
| PtPdCrTiP  | 7.5732                    | 7.5056 | 6.0109   | 5.9135 | 0.06759   | 0.09735   | -9.2796                    | -9.978 | -10.968  | -9.621 | 0.69847   | -1.34697  | BCC   | FCC |
| PtPdCrTiAs | 7.5207                    | 7.4151 | 5.9692   | 5.8375 | 0.10563   | 0.1317    | -9.468                     | -10.52 | -8.678   | -9.536 | 1.052     | 0.858267  | FCC   | FCC |
| PtPdCrTiSb | 7.7885                    | 7.7408 | 6.1817   | 6.1293 | 0.04765   | 0.0524    | -5.3731                    | -5.268 | -3.5042  | -3.809 | -0.1054   | 0.304712  | FCC   | FCC |
| PtPdCrVMn  | 7.0259                    | 7.0384 | 5.5764   | 5.6342 | -0.01254  | -0.05777  | -9.4705                    | -8.164 | -5.1849  | -5.034 | -1.3063   | -0.15102  | FCC   | FCC |
| PtPdCrVZn  | 7.1597                    | 7.1767 | 5.6827   | 5.7134 | -0.01701  | -0.03075  | -7.9876                    | -8.32  | -8.023   | -9.015 | 0.33282   | 0.991606  | BCC   | BCC |
| PtPdCrVY   | 7.6519                    | 7.6509 | 6.0733   | 6.0586 | 0.00103   | 0.01474   | -2.2184                    | -2.998 | 3.9484   | 3.6559 | 0.77943   | 0.292472  | FCC   | FCC |
| PtPdCrVNb  | 7.2817                    | 7.2971 | 5.7795   | 5.7819 | -0.01545  | -0.00245  | -8.898                     | -8.474 | -3.1218  | -3.321 | -0.4237   | 0.199266  | FCC   | FCC |
| PtPdCrVTc  | 7.1659                    | 7.162  | 5.6876   | 5.721  | 0.00386   | -0.03345  | -9.5297                    | -10.59 | -8.3161  | -9.344 | 1.05886   | 1.027829  | FCC   | FCC |
| PtPdCrVCd  | 7.4248                    | 7.3455 | 5.8931   | 5.9195 | 0.07928   | -0.02645  | -1.6115                    | -1.31  | -2.445   | -2.243 | -0.3013   | -0.20188  | BCC   | BCC |
| PtPdCrVHf  | 7.4372                    | 7.4312 | 5.9029   | 5.9181 | 0.00603   | -0.01517  | -6.6906                    | -5.719 | -8.8043  | -9.268 | -0.9721   | 0.463385  | BCC   | BCC |
| PtPdCrVTa  | 7.2912                    | 7.2839 | 5.787    | 5.7941 | 0.00731   | -0.00706  | -3.8966                    | -3.247 | -6.8302  | -6.044 | -0.6494   | -0.78577  | BCC   | BCC |
| PtPdCrVRe  | 7.1805                    | 7.1672 | 5.6992   | 5.739  | 0.01329   | -0.03984  | -3.1957                    | -4.097 | -5.3432  | -6.213 | 0.90134   | 0.86982   | BCC   | BCC |
| PtPdCrVHg  | 7.4716                    | 7.4881 | 5.9303   | 6.0143 | -0.01646  | -0.08405  | -5.0896                    | -6.697 | -10.997  | -10.18 | 1.60726   | -0.81462  | BCC   | BCC |
| PtPdCrVAl  | 7.2342                    | 7.4329 | 5.7418   | 5.6421 | -0.19873  | 0.09966   | -9.6648                    | -9.293 | -9.2311  | -8.469 | -0.3717   | -0.7622   | FCC   | FCC |

| HEAs       | Lattice parameters (Bohr) |        |          |        |           |           | $\Delta H_f$ (kJ/mol*f.u.) |        |          |        |           |           | Phase |     |
|------------|---------------------------|--------|----------|--------|-----------|-----------|----------------------------|--------|----------|--------|-----------|-----------|-------|-----|
|            | FCC Cal.                  | FCC ML | BCC Cal. | BCC ML | FCC error | BCC error | FCC Cal.                   | FCC ML | BCC Cal. | BCC ML | FCC error | BCC error | Cal.  | ML  |
| PtPdCrVGa  | 7.2862                    | 7.4575 | 5.783    | 5.817  | -0.17135  | -0.03398  | -8.129                     | -8.557 | -9.1494  | -10.64 | 0.42784   | 1.489432  | BCC   | BCC |
| PtPdCrVTl  | 7.6356                    | 7.6734 | 6.0604   | 6.0923 | -0.03784  | -0.03195  | 9.26436                    | 7.532  | 9.2678   | 10.777 | 1.73236   | -1.50871  | FCC   | FCC |
| PtPdCrVSi  | 7.3619                    | 7.4819 | 5.8432   | 5.7164 | -0.11999  | 0.12675   | -10.465                    | -10.57 | -8.8699  | -8.87  | 0.1057    | 0         | FCC   | FCC |
| PtPdCrVGe  | 7.4475                    | 7.4732 | 5.9111   | 5.8318 | -0.02572  | 0.07927   | -9.2909                    | -10.1  | -12.259  | -12.02 | 0.8079    | -0.24038  | BCC   | BCC |
| PtPdCrVPb  | 7.689                     | 7.7039 | 6.1028   | 6.1082 | -0.0149   | -0.00543  | 4.6469                     | 4.1864 | 1.4259   | 1.455  | 0.4605    | -0.0291   | BCC   | BCC |
| PtPdCrVP   | 7.4647                    | 7.4454 | 5.9247   | 5.8585 | 0.01928   | 0.06622   | -10.729                    | -10.03 | -7.1251  | -8.19  | -0.7019   | 1.064674  | FCC   | FCC |
| PtPdCrVAs  | 7.4107                    | 7.3167 | 5.8818   | 5.7723 | 0.09396   | 0.10954   | -13.726                    | -10.89 | -8.5279  | -8.977 | -2.8323   | 0.448835  | FCC   | FCC |
| PtPdCrVSb  | 7.686                     | 7.6593 | 6.1004   | 6.0517 | 0.02667   | 0.04866   | -4.3378                    | -5.784 | -6.1134  | -6.574 | 1.44593   | 0.460145  | BCC   | BCC |
| PtPdCrMnZn | 7.0808                    | 7.124  | 5.6201   | 5.642  | -0.04318  | -0.02195  | -8.3047                    | -7.349 | -6.1816  | -7.025 | -0.9554   | 0.84294   | FCC   | FCC |
| PtPdCrMnY  | 7.583                     | 7.6148 | 6.0187   | 6.0184 | -0.03177  | 0.00025   | -2.6296                    | -2.529 | 4.4357   | 4.3918 | -0.1011   | 0.043918  | FCC   | FCC |
| PtPdCrMnNb | 7.2054                    | 7.2276 | 5.719    | 5.7287 | -0.02216  | -0.00973  | -2.7563                    | -2.702 | -4.0711  | -3.877 | -0.054    | -0.19386  | BCC   | BCC |
| PtPdCrMnTc | 7.0871                    | 7.0976 | 5.6251   | 5.6742 | -0.01047  | -0.04914  | -9.5524                    | -8.529 | -6.4714  | -6.105 | -1.0235   | -0.36631  | FCC   | FCC |
| PtPdCrMnCd | 7.3515                    | 7.2999 | 5.8349   | 5.8723 | 0.05163   | -0.03738  | -0.1912                    | -0.22  | -1.1696  | -1.218 | 0.02857   | 0.048732  | BCC   | BCC |
| PtPdCrMnHf | 7.3642                    | 7.3691 | 5.845    | 5.8831 | -0.00487  | -0.03811  | -2.5919                    | -2.541 | -3.8421  | -4.131 | -0.0508   | 0.289191  | BCC   | BCC |
| PtPdCrMnTa | 7.2152                    | 7.2234 | 5.7267   | 5.7525 | -0.00818  | -0.02578  | -0.4947                    | -0.43  | -1.845   | -1.708 | -0.0645   | -0.13666  | BCC   | BCC |
| PtPdCrMnRe | 7.1021                    | 7.1036 | 5.6369   | 5.7021 | -0.00151  | -0.06516  | -1.6385                    | -1.546 | -0.0515  | -0.049 | -0.0927   | -0.00292  | FCC   | FCC |
| PtPdCrMnHg | 7.3993                    | 7.4338 | 5.8729   | 5.968  | -0.03448  | -0.09515  | -4.4568                    | -5.065 | -5.5113  | -4.671 | 0.60774   | -0.84071  | BCC   | FCC |
| PtPdCrMnAl | 7.1569                    | 7.3948 | 5.6805   | 5.6133 | -0.23786  | 0.06717   | -10.296                    | -9.276 | -4.4777  | -5.395 | -1.0204   | 0.917116  | FCC   | FCC |
| PtPdCrMnGa | 7.2101                    | 7.4105 | 5.7226   | 5.7685 | -0.20045  | -0.04588  | -10.711                    | -8.501 | -9.388   | -8.308 | -2.2102   | -1.08004  | FCC   | FCC |
| PtPdCrMnTl | 7.5664                    | 7.6626 | 6.0054   | 6.0453 | -0.09624  | -0.03988  | 5.68955                    | 5.2681 | 9.4152   | 8.7178 | 0.42145   | 0.697424  | FCC   | FCC |
| PtPdCrMnSi | 7.2874                    | 7.3781 | 5.784    | 5.6799 | -0.09071  | 0.10411   | -9.3695                    | -9.968 | -13.052  | -12.92 | 0.59805   | -0.12923  | BCC   | BCC |
| PtPdCrMnGe | 7.3747                    | 7.4166 | 5.8533   | 5.7934 | -0.04192  | 0.05989   | -10.995                    | -9.996 | -9.123   | -10.86 | -0.9996   | 1.737712  | FCC   | BCC |
| PtPdCrMnPb | 7.6208                    | 7.6157 | 6.0486   | 6.0599 | 0.00507   | -0.01129  | 5.9676                     | 6.5578 | -0.3681  | -0.423 | -0.5902   | 0.055003  | BCC   | BCC |
| PtPdCrMnP  | 7.3922                    | 7.4271 | 5.8672   | 5.8271 | -0.03488  | 0.04011   | -9.394                     | -9.489 | -8.8544  | -9.624 | 0.09489   | 0.769944  | FCC   | BCC |
| PtPdCrMnAs | 7.3371                    | 7.2869 | 5.8235   | 5.7434 | 0.05023   | 0.08008   | -7.8507                    | -9.129 | -9.8662  | -9.866 | 1.27802   | 0         | BCC   | BCC |
| PtPdCrMnSb | 7.6177                    | 7.5703 | 6.0462   | 6.007  | 0.04738   | 0.03916   | -3.5156                    | -3.255 | -4.3671  | -5.02  | -0.2604   | 0.652548  | BCC   | BCC |
| PtPdCrZnY  | 7.6983                    | 7.6297 | 6.1102   | 6.1052 | 0.06864   | 0.00498   | -7.2261                    | -6.339 | -4.5002  | -3.814 | -0.8874   | -0.68647  | FCC   | FCC |
| PtPdCrZnNb | 7.3329                    | 7.313  | 5.8201   | 5.8086 | 0.01985   | 0.01149   | -8.3546                    | -8.272 | -9.1909  | -8.134 | -0.0827   | -1.05736  | BCC   | FCC |

| HEAs       | Lattice parameters (Bohr) |        |          |        |           |           | $\Delta H_f$ (kJ/mol*f.u.) |        |          |        |           |           | Phase |     |
|------------|---------------------------|--------|----------|--------|-----------|-----------|----------------------------|--------|----------|--------|-----------|-----------|-------|-----|
|            | FCC Cal.                  | FCC ML | BCC Cal. | BCC ML | FCC error | BCC error | FCC Cal.                   | FCC ML | BCC Cal. | BCC ML | FCC error | BCC error | Cal.  | ML  |
| PtPdCrZnTc | 7.2187                    | 7.2193 | 5.7295   | 5.7445 | -0.00058  | -0.015    | -9.5214                    | -8.735 | -8.9133  | -9.904 | -0.7862   | 0.99037   | FCC   | BCC |
| PtPdCrZnCd | 7.4741                    | 7.4367 | 5.9322   | 5.9361 | 0.03735   | -0.00394  | -6.5392                    | -7.693 | -3.5505  | -3.481 | 1.15398   | -0.06962  | FCC   | FCC |
| PtPdCrZnHf | 7.4863                    | 7.459  | 5.9419   | 5.9429 | 0.02733   | -0.00099  | -5.1989                    | -5.305 | -4.4108  | -3.903 | 0.1061    | -0.50744  | FCC   | FCC |
| PtPdCrZnTa | 7.3423                    | 7.3141 | 5.8276   | 5.8269 | 0.02819   | 0.00068   | -6.1309                    | -6.321 | -2.8159  | -2.873 | 0.18962   | 0.057468  | FCC   | FCC |
| PtPdCrZnRe | 7.2331                    | 7.2113 | 5.741    | 5.7738 | 0.02184   | -0.03285  | -2.8323                    | -3.497 | -2.539   | -2.189 | 0.66437   | -0.35021  | FCC   | FCC |
| PtPdCrZnHg | 7.5203                    | 7.5349 | 5.9689   | 6.023  | -0.0146   | -0.05413  | -9.0907                    | -8.417 | -2.258   | -2.11  | -0.6734   | -0.14772  | FCC   | FCC |
| PtPdCrZnAl | 7.286                     | 7.402  | 5.7829   | 5.7217 | -0.11596  | 0.06123   | -9.6914                    | -9.23  | -9.2608  | -10.77 | -0.4615   | 1.507576  | FCC   | BCC |
| PtPdCrZnGa | 7.3373                    | 7.4735 | 5.8236   | 5.8621 | -0.1362   | -0.03848  | -7.1583                    | -9.544 | -11.155  | -12.26 | 2.3861    | 1.103283  | BCC   | BCC |
| PtPdCrZnTl | 7.6822                    | 7.6178 | 6.0974   | 6.1096 | 0.06438   | -0.01225  | 4.67678                    | 5.0288 | 1.7036   | 1.8929 | -0.352    | -0.18929  | BCC   | BCC |
| PtPdCrZnSi | 7.412                     | 7.3263 | 5.8829   | 5.7742 | 0.08572   | 0.10872   | -10.233                    | -10.13 | -14.403  | -15.32 | -0.1013   | 0.919338  | BCC   | BCC |
| PtPdCrZnGe | 7.4965                    | 7.4036 | 5.9499   | 5.8786 | 0.09285   | 0.07134   | -9.1706                    | -10.3  | -14.249  | -14.25 | 1.13344   | 0         | BCC   | BCC |
| PtPdCrZnPb | 7.735                     | 7.6097 | 6.1393   | 6.131  | 0.12528   | 0.00826   | -1.7304                    | -1.531 | -2.9762  | -2.588 | -0.1991   | -0.3882   | BCC   | BCC |
| PtPdCrZnP  | 7.5134                    | 7.4426 | 5.9634   | 5.8598 | 0.07083   | 0.10361   | -8.4634                    | -8.816 | -9.2759  | -9.184 | 0.35264   | -0.09184  | BCC   | BCC |
| PtPdCrZnAs | 7.4601                    | 7.3356 | 5.9211   | 5.7948 | 0.12452   | 0.1263    | -9.9687                    | -9.404 | -7.8078  | -7.58  | -0.5643   | -0.22741  | FCC   | FCC |
| PtPdCrZnSb | 7.732                     | 7.6003 | 6.1369   | 6.0771 | 0.13168   | 0.05978   | -6.6997                    | -5.63  | -7.2771  | -7.426 | -1.0697   | 0.148512  | BCC   | BCC |
| PtPdCrYNb  | 7.8042                    | 7.7761 | 6.1942   | 6.1869 | 0.02808   | 0.00728   | -7.5364                    | -6.851 | 5.4772   | 5.2164 | -0.6851   | 0.26082   | FCC   | FCC |
| PtPdCrYTc  | 7.7037                    | 7.7311 | 6.1144   | 6.1058 | -0.02741  | 0.00862   | 0.48937                    | 0.5262 | 1.2277   | 1.3794 | -0.0368   | -0.15173  | FCC   | FCC |
| PtPdCrYCd  | 7.9292                    | 7.9032 | 6.2934   | 6.2885 | 0.02604   | 0.00494   | -1.2693                    | -1.113 | 3.776    | 3.4963 | -0.1559   | 0.279704  | FCC   | FCC |
| PtPdCrYHf  | 7.9402                    | 7.9342 | 6.3021   | 6.3047 | 0.00596   | -0.00259  | -0.5886                    | -0.626 | 5.1974   | 4.8574 | 0.03757   | 0.340018  | FCC   | FCC |
| PtPdCrYTd  | 7.8125                    | 7.8136 | 6.2008   | 6.1932 | -0.00109  | 0.00759   | -5.8929                    | -5.124 | 4.8442   | 4.4854 | -0.7686   | 0.358832  | FCC   | FCC |
| PtPdCrYRe  | 7.7164                    | 7.761  | 6.1245   | 6.1385 | -0.04465  | -0.01403  | 0.01423                    | 0.0153 | 2.7586   | 2.6525 | -0.0011   | 0.1061    | FCC   | FCC |
| PtPdCrYHg  | 7.9704                    | 8.0447 | 6.3261   | 6.3813 | -0.07432  | -0.05521  | -2.1576                    | -2.397 | -1.5422  | -1.59  | 0.23973   | 0.047697  | FCC   | FCC |
| PtPdCrYAl  | 7.7629                    | 7.7544 | 6.1614   | 6.1377 | 0.0085    | 0.02371   | -2.998                     | -2.968 | -8.4905  | -8.164 | -0.0297   | -0.32656  | BCC   | BCC |
| PtPdCrYGa  | 7.8081                    | 7.9065 | 6.1973   | 6.2259 | -0.0984   | -0.0286   | -3.0626                    | -2.47  | -4.8309  | -5.195 | -0.5928   | 0.363615  | BCC   | BCC |
| PtPdCrYTl  | 7.6356                    | 7.9356 | 6.4409   | 6.4151 | -0.3      | 0.02575   | -0.8894                    | -0.754 | 16.029   | 16.191 | -0.1357   | -0.16191  | FCC   | FCC |
| PtPdCrYSi  | 7.8742                    | 7.8002 | 6.2498   | 6.1509 | 0.074     | 0.09886   | -8.144                     | -8.144 | -8.8543  | -8.767 | 0         | -0.08767  | BCC   | BCC |
| PtPdCrYGe  | 7.9492                    | 7.9416 | 6.3093   | 6.2649 | 0.00755   | 0.04435   | -2.0757                    | -2.306 | -4.5147  | -4.752 | 0.23063   | 0.237615  | BCC   | BCC |
| PtPdCrYPb  | 8.1623                    | 8.223  | 6.4785   | 6.3769 | -0.06066  | 0.10155   | -4.5384                    | -4.322 | 11.621   | 12.106 | -0.2161   | -0.48422  | FCC   | FCC |

| HEAs       | Lattice parameters (Bohr) |        |          |        |           |           | $\Delta H_f$ (kJ/mol*f.u.) |        |          |        |           |           | Phase |     |
|------------|---------------------------|--------|----------|--------|-----------|-----------|----------------------------|--------|----------|--------|-----------|-----------|-------|-----|
|            | FCC Cal.                  | FCC ML | BCC Cal. | BCC ML | FCC error | BCC error | FCC Cal.                   | FCC ML | BCC Cal. | BCC ML | FCC error | BCC error | Cal.  | ML  |
| PtPdCrYP   | 7.9643                    | 7.7924 | 6.3212   | 6.2817 | 0.17186   | 0.03953   | -13.384                    | -14.24 | -14.692  | -15.63 | 0.8543    | 0.937812  | BCC   | BCC |
| PtPdCrYAs  | 7.9169                    | 7.7615 | 6.2836   | 6.2189 | 0.15536   | 0.06472   | -13.095                    | -10.48 | -7.8185  | -9.653 | -2.6191   | 1.833975  | FCC   | FCC |
| PtPdCrYSb  | 8.1596                    | 8.2168 | 6.4763   | 6.3714 | -0.05716  | 0.10491   | -4.4566                    | -4.204 | 5.1891   | 5.0874 | -0.2523   | 0.101748  | FCC   | FCC |
| PtPdCrNbTc | 7.3387                    | 7.3474 | 5.8248   | 5.8197 | -0.00866  | 0.00506   | -4.8284                    | -5.961 | -6.8401  | -5.948 | 1.13259   | -0.89219  | BCC   | FCC |
| PtPdCrNbCd | 7.5862                    | 7.54   | 6.0212   | 6.0072 | 0.04619   | 0.01397   | -1.7997                    | -2.117 | -3.5993  | -4.044 | 0.3176    | 0.444862  | BCC   | BCC |
| PtPdCrNbHf | 7.5981                    | 7.5792 | 6.0306   | 6.0119 | 0.01892   | 0.01873   | -3.1857                    | -2.723 | -3.7897  | -4.119 | -0.4629   | 0.329536  | BCC   | BCC |
| PtPdCrNbTa | 7.4584                    | 7.4422 | 5.9197   | 5.8954 | 0.0162    | 0.02433   | -3.1759                    | -4.292 | -10.014  | -11.25 | 1.11587   | 1.237676  | BCC   | BCC |
| PtPdCrNbRe | 7.3527                    | 7.3527 | 5.8358   | 5.8377 | -1E-05    | -0.00186  | 2.38571                    | 2.0048 | -2.648   | -2.364 | 0.38091   | -0.28372  | BCC   | BCC |
| PtPdCrNbHg | 7.6311                    | 7.6744 | 6.0568   | 6.0924 | -0.0433   | -0.03559  | -1.5516                    | -1.825 | -4.4719  | -4.809 | 0.27381   | 0.336595  | BCC   | BCC |
| PtPdCrNbAl | 7.4039                    | 7.4177 | 5.8765   | 5.7528 | -0.01379  | 0.12368   | -12.244                    | -12.37 | -8.0732  | -7.02  | 0.12368   | -1.05303  | FCC   | FCC |
| PtPdCrNbGa | 7.4536                    | 7.5622 | 5.9159   | 5.9284 | -0.10864  | -0.01251  | -11.92                     | -10.36 | -11.359  | -12.91 | -1.5547   | 1.5489    | FCC   | BCC |
| PtPdCrNbTl | 7.7885                    | 7.8129 | 6.1817   | 6.1908 | -0.02445  | -0.0091   | 4.99928                    | 5.1539 | 10.519   | 10.213 | -0.1546   | 0.306375  | FCC   | FCC |
| PtPdCrNbSi | 7.526                     | 7.4944 | 5.9734   | 5.8065 | 0.03161   | 0.16689   | -10.924                    | -13.49 | -8.8042  | -7.932 | 2.56251   | -0.87249  | FCC   | FCC |
| PtPdCrNbGe | 7.6079                    | 7.5443 | 6.0384   | 5.9445 | 0.06364   | 0.09393   | -15.787                    | -12.83 | -7.3184  | -7.955 | -2.952    | 0.636384  | FCC   | FCC |
| PtPdCrNbPb | 7.8398                    | 7.8665 | 6.2225   | 6.2029 | -0.02667  | 0.01958   | 2.74849                    | 3.4791 | 5.3992   | 5.8056 | -0.7306   | -0.40639  | FCC   | FCC |
| PtPdCrNbP  | 7.6244                    | 7.4981 | 6.0515   | 5.9672 | 0.12632   | 0.08431   | -8.0535                    | -10.74 | -10.885  | -10.27 | 2.6845    | -0.61613  | BCC   | FCC |
| PtPdCrNbAs | 7.5727                    | 7.3825 | 6.0104   | 5.8767 | 0.19017   | 0.13373   | -9.776                     | -11.37 | -8.3428  | -8.022 | 1.59144   | -0.32088  | FCC   | FCC |
| PtPdCrNbSb | 7.8369                    | 7.7976 | 6.2202   | 6.1436 | 0.03932   | 0.07656   | -1.8821                    | -1.981 | -3.5377  | -3.369 | 0.09906   | -0.16846  | BCC   | BCC |
| PtPdCrTcCd | 7.4797                    | 7.4039 | 5.9367   | 5.9546 | 0.07582   | -0.01794  | -1.0628                    | -0.864 | -1.9171  | -2.154 | -0.1987   | 0.23694   | BCC   | BCC |
| PtPdCrTcHf | 7.492                     | 7.4873 | 5.9464   | 5.956  | 0.00468   | -0.00961  | -4.4415                    | -4.579 | -7.9204  | -7.543 | 0.13737   | -0.37716  | BCC   | BCC |
| PtPdCrTcTa | 7.3482                    | 7.3433 | 5.8322   | 5.8335 | 0.00486   | -0.00126  | -0.5056                    | -0.665 | -3.9034  | -4.386 | 0.15967   | 0.482438  | BCC   | BCC |
| PtPdCrTcRe | 7.2392                    | 7.2264 | 5.7458   | 5.7795 | 0.01279   | -0.03375  | -2.1242                    | -2.284 | -5.7339  | -4.943 | 0.15989   | -0.79088  | BCC   | BCC |
| PtPdCrTcHg | 7.5259                    | 7.5288 | 5.9733   | 6.0454 | -0.0029   | -0.07209  | -6.39                      | -5.809 | -8.3683  | -7.277 | -0.5809   | -1.09152  | BCC   | BCC |
| PtPdCrTcAl | 7.292                     | 7.3942 | 5.7877   | 5.7033 | -0.1022   | 0.08436   | -9.5914                    | -10.43 | -8.4189  | -8.095 | 0.83403   | -0.3238   | FCC   | FCC |
| PtPdCrTcGa | 7.3432                    | 7.4836 | 5.8283   | 5.8725 | -0.14043  | -0.04422  | -6.88                      | -8.709 | -11.817  | -10.84 | 1.82887   | -0.97568  | BCC   | BCC |
| PtPdCrTcTl | 7.6875                    | 7.7245 | 6.1016   | 6.123  | -0.03696  | -0.0214   | 7.31811                    | 8.2226 | 5.6525   | 6.3511 | -0.9045   | -0.69862  | BCC   | BCC |
| PtPdCrTcSi | 7.4178                    | 7.4076 | 5.8875   | 5.7726 | 0.01018   | 0.1149    | -12.483                    | -11.78 | -8.3742  | -8.291 | -0.7066   | -0.08291  | FCC   | FCC |
| PtPdCrTcGe | 7.5021                    | 7.464  | 5.9544   | 5.8991 | 0.03808   | 0.05531   | -11.251                    | -10.72 | -9.6047  | -10.33 | -0.5358   | 0.722932  | FCC   | FCC |

| HEAs       | Lattice parameters (Bohr) |        |          |        |           |           | $\Delta H_f$ (kJ/mol*f.u.) |        |          |        |           |           | Phase |     |
|------------|---------------------------|--------|----------|--------|-----------|-----------|----------------------------|--------|----------|--------|-----------|-----------|-------|-----|
|            | FCC Cal.                  | FCC ML | BCC Cal. | BCC ML | FCC error | BCC error | FCC Cal.                   | FCC ML | BCC Cal. | BCC ML | FCC error | BCC error | Cal.  | ML  |
| PtPdCrTcPb | 7.7403                    | 7.7423 | 6.1435   | 6.1417 | -0.00203  | 0.00175   | 5.92745                    | 4.7802 | -2.3863  | -2.681 | 1.14725   | 0.294932  | BCC   | BCC |
| PtPdCrTcP  | 7.519                     | 7.4545 | 5.9679   | 5.8967 | 0.06454   | 0.07116   | -9.1847                    | -8.917 | -7.4632  | -7.856 | -0.2675   | 0.3928    | FCC   | FCC |
| PtPdCrTcAs | 7.4658                    | 7.3192 | 5.9256   | 5.8173 | 0.1466    | 0.10831   | -12.555                    | -10.12 | -8.1213  | -8.203 | -2.43     | 0.082033  | FCC   | FCC |
| PtPdCrTcSb | 7.7373                    | 7.6843 | 6.1411   | 6.0995 | 0.05297   | 0.04158   | -6.0586                    | -7.045 | -8.8152  | -7.871 | 0.98629   | -0.94448  | BCC   | BCC |
| PtPdCrCdHf | 7.7299                    | 7.6444 | 6.1352   | 6.1329 | 0.08548   | 0.00231   | -1.7939                    | -2.039 | -3.2357  | -2.789 | 0.24462   | -0.4463   | BCC   | BCC |
| PtPdCrCdTa | 7.595                     | 7.5183 | 6.0282   | 6.0182 | 0.07671   | 0.00996   | -0.3313                    | -0.286 | -2.3057  | -2.681 | -0.0457   | 0.375354  | BCC   | BCC |
| PtPdCrCdRe | 7.4932                    | 7.3809 | 5.9473   | 5.9787 | 0.11225   | -0.03138  | 5.89388                    | 5.3098 | 0.7661   | 0.912  | 0.58408   | -0.14592  | BCC   | BCC |
| PtPdCrCdHg | 7.7618                    | 7.6957 | 6.1605   | 6.2202 | 0.06606   | -0.05969  | 1.33047                    | 1.3173 | -0.1384  | -0.127 | 0.01317   | -0.01143  | BCC   | BCC |
| PtPdCrCdAl | 7.5425                    | 7.5067 | 5.9865   | 5.9106 | 0.03578   | 0.07587   | -8.7815                    | -7.57  | -6.4814  | -6.895 | -1.2112   | 0.413706  | FCC   | FCC |
| PtPdCrCdGa | 7.5904                    | 7.6168 | 6.0245   | 6.0479 | -0.02645  | -0.02344  | -7.827                     | -8.997 | -8.7595  | -8.036 | 1.16956   | -0.72326  | BCC   | FCC |
| PtPdCrCdTl | 7.914                     | 7.8788 | 6.2814   | 6.2818 | 0.0352    | -0.00045  | 7.45867                    | 7.1718 | 7.9597   | 7.1069 | 0.28687   | 0.852828  | FCC   | BCC |
| PtPdCrCdSi | 7.6602                    | 7.4724 | 6.0799   | 5.9384 | 0.18784   | 0.14154   | -8.6464                    | -10.81 | -12.143  | -10.65 | 2.1616    | -1.49124  | BCC   | FCC |
| PtPdCrCdGe | 7.7394                    | 7.5899 | 6.1427   | 6.0764 | 0.14947   | 0.06634   | -5.402                     | -4.657 | -5.4733  | -5.419 | -0.7451   | -0.05419  | BCC   | BCC |
| PtPdCrCdPb | 7.9638                    | 7.8494 | 6.3209   | 6.295  | 0.11438   | 0.02586   | 5.13834                    | 5.2432 | 0.9284   | 0.8073 | -0.1049   | 0.121095  | BCC   | BCC |
| PtPdCrCdP  | 7.7553                    | 7.5716 | 6.1554   | 6.0147 | 0.1837    | 0.14069   | -8.5108                    | -9.456 | -9.946   | -8.574 | 0.94564   | -1.37186  | BCC   | FCC |
| PtPdCrCdAs | 7.7053                    | 7.5605 | 6.1157   | 5.9601 | 0.1448    | 0.1556    | -11.271                    | -9.163 | -8.3585  | -7.397 | -2.1075   | -0.9616   | FCC   | FCC |
| PtPdCrCdSb | 7.961                     | 7.7854 | 6.3186   | 6.2624 | 0.17556   | 0.05622   | -1.4434                    | -1.266 | -4.0054  | -3.366 | -0.1773   | -0.63952  | BCC   | BCC |
| PtPdCrHfTa | 7.6069                    | 7.5693 | 6.0376   | 6.0281 | 0.03761   | 0.00951   | -1.0017                    | -0.973 | -9.1868  | -9.471 | -0.0292   | 0.284127  | BCC   | BCC |
| PtPdCrHfRe | 7.5054                    | 7.483  | 5.957    | 5.9912 | 0.02237   | -0.03418  | -1.7457                    | -1.695 | -3.1789  | -3.532 | -0.0508   | 0.35321   | BCC   | BCC |
| PtPdCrHfHg | 7.7732                    | 7.746  | 6.1696   | 6.224  | 0.02715   | -0.05445  | -1.4863                    | -1.416 | -3.4571  | -3.799 | -0.0708   | 0.34191   | BCC   | BCC |
| PtPdCrHfAl | 7.5545                    | 7.5503 | 5.9961   | 5.9375 | 0.00424   | 0.05855   | -12.81                     | -11.86 | -6.3894  | -6.945 | -0.9489   | 0.5556    | FCC   | FCC |
| PtPdCrHfGa | 7.6023                    | 7.6804 | 6.0339   | 6.0807 | -0.07814  | -0.04679  | -12.392                    | -10.78 | -15.01   | -14.57 | -1.6163   | -0.4372   | BCC   | BCC |
| PtPdCrHfTl | 7.925                     | 7.9631 | 6.29     | 6.3288 | -0.03814  | -0.03876  | 5.61568                    | 5.1997 | 17.994   | 16.066 | 0.41598   | 1.927896  | FCC   | FCC |
| PtPdCrHfSi | 7.6719                    | 7.5692 | 6.0892   | 5.9639 | 0.10273   | 0.12532   | -11.072                    | -14.96 | -7.4862  | -6.806 | 3.89012   | -0.68056  | FCC   | FCC |
| PtPdCrHfGe | 7.7508                    | 7.6819 | 6.1518   | 6.1074 | 0.06893   | 0.04444   | -13.582                    | -12.02 | -9.7248  | -9.004 | -1.5625   | -0.72035  | FCC   | FCC |
| PtPdCrHfPb | 7.9746                    | 7.9719 | 6.3295   | 6.3195 | 0.00271   | 0.00995   | 2.70025                    | 2.3278 | 8.7711   | 8.7711 | 0.37245   | 0         | FCC   | FCC |
| PtPdCrHfP  | 7.7667                    | 7.5805 | 6.1644   | 6.1182 | 0.18621   | 0.04624   | -10.642                    | -10.33 | -9.3642  | -8.143 | -0.31     | -1.22142  | FCC   | FCC |
| PtPdCrHfAs | 7.7169                    | 7.5267 | 6.1249   | 6.0378 | 0.19015   | 0.08707   | -11.594                    | -10.94 | -5.7866  | -6.651 | -0.6562   | 0.864669  | FCC   | FCC |

| HEAs       | Lattice parameters (Bohr) |        |          |        |           |           | $\Delta H_f$ (kJ/mol*f.u.) |        |          |        |           |           | Phase |     |
|------------|---------------------------|--------|----------|--------|-----------|-----------|----------------------------|--------|----------|--------|-----------|-----------|-------|-----|
|            | FCC Cal.                  | FCC ML | BCC Cal. | BCC ML | FCC error | BCC error | FCC Cal.                   | FCC ML | BCC Cal. | BCC ML | FCC error | BCC error | Cal.  | ML  |
| PtPdCrHfSb | 7.9718                    | 7.9206 | 6.3272   | 6.2797 | 0.05119   | 0.04751   | -3.8102                    | -3.496 | -3.0697  | -3.337 | -0.3146   | 0.266928  | FCC   | FCC |
| PtPdCrTaRe | 7.3621                    | 7.3535 | 5.8433   | 5.8598 | 0.00858   | -0.01651  | 1.36392                    | 1.1366 | -2.0612  | -2.316 | 0.22732   | 0.25476   | BCC   | BCC |
| PtPdCrTaHg | 7.6398                    | 7.6247 | 6.0637   | 6.106  | 0.01511   | -0.04228  | -1.1567                    | -0.89  | -2.1071  | -2.15  | -0.2669   | 0.043002  | BCC   | BCC |
| PtPdCrTaAl | 7.4132                    | 7.4016 | 5.8838   | 5.7887 | 0.01156   | 0.09513   | -14.038                    | -13.5  | -6.2088  | -6.087 | -0.5399   | -0.12174  | FCC   | FCC |
| PtPdCrTaGa | 7.4627                    | 7.5215 | 5.9231   | 5.9643 | -0.05881  | -0.04116  | -11.998                    | -10.91 | -11.688  | -13.28 | -1.0907   | 1.593828  | FCC   | BCC |
| PtPdCrTaTl | 7.7968                    | 7.8034 | 6.1883   | 6.2041 | -0.00659  | -0.01576  | 4.36136                    | 4.0383 | 19.386   | 18.118 | 0.32306   | 1.268274  | FCC   | FCC |
| PtPdCrTaSi | 7.535                     | 7.4808 | 5.9805   | 5.8655 | 0.05416   | 0.115     | -16.516                    | -14.36 | -6.2233  | -6.993 | -2.1542   | 0.769175  | FCC   | FCC |
| PtPdCrTaGe | 7.6167                    | 7.535  | 6.0454   | 5.9872 | 0.08171   | 0.05818   | -16.226                    | -13.75 | -8.4839  | -8.93  | -2.4751   | 0.44652   | FCC   | FCC |
| PtPdCrTaPb | 7.8481                    | 7.8316 | 6.229    | 6.2192 | 0.01649   | 0.00983   | 5.29402                    | 4.8569 | 12.448   | 11.634 | 0.43712   | 0.814359  | FCC   | FCC |
| PtPdCrTaP  | 7.6332                    | 7.4754 | 6.0584   | 6.0389 | 0.15775   | 0.01954   | -8.338                     | -9.264 | -6.9918  | -7.769 | 0.92644   | 0.77687   | FCC   | FCC |
| PtPdCrTaAs | 7.5815                    | 7.3746 | 6.0175   | 5.9503 | 0.20692   | 0.06715   | -7.5203                    | -10.03 | -7.2374  | -7.166 | 2.50678   | -0.07166  | FCC   | FCC |
| PtPdCrTaSb | 7.8452                    | 7.7873 | 6.2267   | 6.1749 | 0.05788   | 0.05182   | -2.7386                    | -2.536 | -7.9883  | -8.876 | -0.2029   | 0.88759   | BCC   | BCC |
| PtPdCrReHg | 7.5392                    | 7.5    | 5.9838   | 6.065  | 0.03917   | -0.08116  | 3.22134                    | 3.039  | 1.4228   | 1.3949 | 0.18234   | 0.027898  | BCC   | BCC |
| PtPdCrReAl | 7.3061                    | 7.3483 | 5.7989   | 5.727  | -0.04216  | 0.07188   | -9.7811                    | -10.87 | -6.916   | -6.715 | 1.08679   | -0.20144  | FCC   | FCC |
| PtPdCrReGa | 7.3571                    | 7.4517 | 5.8393   | 5.8898 | -0.09459  | -0.05046  | -10.037                    | -10.46 | -9.3197  | -10.24 | 0.4182    | 0.921726  | FCC   | FCC |
| PtPdCrReTl | 7.7003                    | 7.7162 | 6.1117   | 6.1367 | -0.01594  | -0.025    | 9.04067                    | 7.5972 | 10.409   | 11.565 | 1.44347   | -1.15654  | FCC   | FCC |
| PtPdCrReSi | 7.4314                    | 7.3994 | 5.8983   | 5.8001 | 0.03204   | 0.09824   | -10.266                    | -12.52 | -8.0345  | -7.238 | 2.2536    | -0.79621  | FCC   | FCC |
| PtPdCrReGe | 7.5154                    | 7.454  | 5.965    | 5.9287 | 0.06144   | 0.03631   | -13.843                    | -11.35 | -8.9449  | -8.77  | -2.4963   | -0.17539  | FCC   | FCC |
| PtPdCrRePb | 7.7528                    | 7.7229 | 6.1534   | 6.1551 | 0.02992   | -0.00169  | 6.33251                    | 6.6658 | 1.036    | 1.036  | -0.3333   | 0         | BCC   | BCC |
| PtPdCrReP  | 7.5323                    | 7.4474 | 5.9784   | 5.9357 | 0.08493   | 0.04272   | -7.6121                    | -8.65  | -6.282   | -6.613 | 1.03801   | 0.33063   | FCC   | FCC |
| PtPdCrReAs | 7.4793                    | 7.3273 | 5.9363   | 5.8644 | 0.15199   | 0.07192   | -7.7363                    | -8.319 | -7.9201  | -7.072 | 0.5823    | -0.84858  | BCC   | FCC |
| PtPdCrReSb | 7.7498                    | 7.6622 | 6.1511   | 6.1215 | 0.08763   | 0.02955   | -0.0332                    | -0.031 | -0.8915  | -0.841 | -0.0027   | -0.05046  | BCC   | BCC |
| PtPdCrHgAl | 7.5879                    | 7.5539 | 6.0225   | 6.017  | 0.03401   | 0.00553   | -8.0532                    | -8.218 | -6.4732  | -7.356 | 0.16435   | 0.882708  | FCC   | FCC |
| PtPdCrHgGa | 7.6352                    | 7.6983 | 6.0601   | 6.1452 | -0.0631   | -0.08513  | -8.6246                    | -9.175 | -13.323  | -11.69 | 0.55051   | -1.63612  | BCC   | BCC |
| PtPdCrHgTl | 7.9553                    | 7.9624 | 6.3141   | 6.3689 | -0.00711  | -0.05478  | 5.44555                    | 6.8931 | 6.1963   | 6.7351 | -1.4476   | -0.53881  | FCC   | BCC |
| PtPdCrHgSi | 7.7043                    | 7.5257 | 6.1149   | 6.0485 | 0.17859   | 0.0664    | -12.371                    | -12.13 | -10.988  | -9.899 | -0.2426   | -1.08892  | FCC   | FCC |
| PtPdCrHgGe | 7.7825                    | 7.6571 | 6.177    | 6.1703 | 0.12543   | 0.0067    | -8.9864                    | -9.459 | -7.961   | -7.729 | 0.47297   | -0.23187  | FCC   | FCC |
| PtPdCrHgPb | 8.0046                    | 7.9964 | 6.3532   | 6.4001 | 0.00817   | -0.04687  | 3.52869                    | 4.4667 | -2.003   | -1.945 | -0.938    | -0.05834  | BCC   | BCC |

| HEAs       | Lattice parameters (Bohr) |        |          |        |           |           | $\Delta H_f$ (kJ/mol*f.u.) |        |          |        |           |           | Phase |     |
|------------|---------------------------|--------|----------|--------|-----------|-----------|----------------------------|--------|----------|--------|-----------|-----------|-------|-----|
|            | FCC Cal.                  | FCC ML | BCC Cal. | BCC ML | FCC error | BCC error | FCC Cal.                   | FCC ML | BCC Cal. | BCC ML | FCC error | BCC error | Cal.  | ML  |
| PtPdCrHgP  | 7.7983                    | 7.6226 | 6.1895   | 6.0969 | 0.17569   | 0.09261   | -6.9663                    | -8.708 | -7.072   | -7.216 | 1.74158   | 0.144326  | BCC   | FCC |
| PtPdCrHgAs | 7.7488                    | 7.5913 | 6.1503   | 6.0435 | 0.15754   | 0.10676   | -11.376                    | -11.61 | -8.6984  | -7.836 | 0.23216   | -0.862    | FCC   | FCC |
| PtPdCrHgSb | 8.0018                    | 7.8501 | 6.351    | 6.3457 | 0.15167   | 0.00531   | -3.1628                    | -3.071 | 2.3401   | 2.2501 | -0.0921   | 0.090004  | FCC   | FCC |
| PtPdCrAlGa | 7.7083                    | 7.8587 | 5.8799   | 5.8433 | -0.15043  | 0.03664   | -8.1079                    | -9.539 | -10.241  | -9.144 | 1.43081   | -1.09728  | BCC   | FCC |
| PtPdCrAlTi | 7.747                     | 7.8178 | 6.1488   | 6.1114 | -0.0708   | 0.03739   | -1.3156                    | -1.709 | -7.7239  | -7.427 | 0.39298   | -0.29707  | BCC   | BCC |
| PtPdCrAlSi | 7.4816                    | 7.7775 | 5.9381   | 5.7046 | -0.29591  | 0.23354   | -10.998                    | -10.78 | -14.41   | -12.64 | -0.2156   | -1.76968  | BCC   | BCC |
| PtPdCrAlGe | 7.5645                    | 7.7284 | 6.0039   | 5.8017 | -0.16392  | 0.20223   | -8.8383                    | -10.28 | -11.38   | -11.05 | 1.43879   | -0.33147  | BCC   | BCC |
| PtPdCrAlPb | 7.7989                    | 7.9207 | 6.19     | 6.1285 | -0.12177  | 0.06151   | -2.3268                    | -2.237 | -9.609   | -11.17 | -0.0895   | 1.564262  | BCC   | BCC |
| PtPdCrAlP  | 7.5812                    | 7.6088 | 6.0172   | 5.8289 | -0.02765  | 0.18827   | -8.7351                    | -9.099 | -9.6404  | -9.451 | 0.36396   | -0.18903  | BCC   | BCC |
| PtPdCrAlAs | 7.5288                    | 7.4733 | 5.9756   | 5.766  | 0.0555    | 0.20961   | -12.486                    | -10.41 | -9.6835  | -10.19 | -2.0811   | 0.50966   | FCC   | FCC |
| PtPdCrAlSb | 7.796                     | 7.8169 | 6.1877   | 6.0135 | -0.02092  | 0.17417   | -12.087                    | -9.443 | -8.749   | -8.254 | -2.6441   | -0.49523  | FCC   | FCC |
| PtPdCrGaTi | 7.7924                    | 7.9023 | 6.1848   | 6.2368 | -0.10991  | -0.05198  | -0.3824                    | -0.407 | -3.1477  | -2.786 | 0.02441   | -0.36213  | BCC   | BCC |
| PtPdCrGaSi | 7.5302                    | 7.6863 | 5.9767   | 5.8471 | -0.15608  | 0.12964   | -9.1499                    | -10.17 | -12.074  | -12.45 | 1.01666   | 0.373422  | BCC   | BCC |
| PtPdCrGaGe | 7.6121                    | 7.7294 | 6.0417   | 5.9767 | -0.11733  | 0.065     | -9.0855                    | -10.56 | -13.467  | -13.88 | 1.47903   | 0.41652   | BCC   | BCC |
| PtPdCrGaPb | 7.8437                    | 7.952  | 6.2256   | 6.2435 | -0.10828  | -0.01793  | -3.3044                    | -2.777 | -9.8164  | -8.611 | -0.5276   | -1.20553  | BCC   | BCC |
| PtPdCrGaP  | 7.6285                    | 7.6335 | 6.0548   | 5.9393 | -0.00497  | 0.11547   | -10.847                    | -9.271 | -9.9777  | -8.909 | -1.5761   | -1.06904  | FCC   | FCC |
| PtPdCrGaAs | 7.5768                    | 7.5493 | 6.0137   | 5.9032 | 0.02754   | 0.11054   | -10.179                    | -10.28 | -11.052  | -9.957 | 0.10281   | -1.09529  | BCC   | FCC |
| PtPdCrGaSb | 7.8408                    | 7.9144 | 6.2233   | 6.177  | -0.07359  | 0.04625   | -6.3001                    | -8.75  | -12.602  | -11.56 | 2.45003   | -1.0405   | BCC   | BCC |
| PtPdCrTiSi | 7.8588                    | 7.8772 | 6.2375   | 6.112  | -0.01845  | 0.12549   | -1.1671                    | -0.934 | -7.8395  | -8.711 | -0.2334   | 0.87106   | BCC   | BCC |
| PtPdCrTiGe | 7.934                     | 7.9436 | 6.2972   | 6.2403 | -0.00961  | 0.05691   | 1.27658                    | 1.5568 | -2.6911  | -2.492 | -0.2802   | -0.19934  | BCC   | BCC |
| PtPdCrTiPb | 8.148                     | 8.1607 | 6.467    | 6.5004 | -0.01274  | -0.03336  | 7.56925                    | 8.905  | 6.5444   | 7.037  | -1.3358   | -0.49259  | BCC   | BCC |
| PtPdCrTiP  | 7.9492                    | 7.8715 | 6.3093   | 6.1811 | 0.07765   | 0.12815   | -10.249                    | -8.401 | -10.933  | -9.85  | -1.8482   | -1.08348  | BCC   | BCC |
| PtPdCrTiAs | 7.9016                    | 7.8015 | 6.2715   | 6.1405 | 0.10008   | 0.13099   | -2.9335                    | -3.667 | -3.9519  | -3.407 | 0.73338   | -0.54509  | BCC   | FCC |
| PtPdCrTiSb | 8.1453                    | 8.1359 | 6.4649   | 6.4111 | 0.00936   | 0.05379   | 4.74871                    | 4.6104 | 3.6996   | 3.9357 | 0.13831   | -0.23614  | BCC   | BCC |
| PtPdCrSiGe | 7.6816                    | 7.6683 | 6.0969   | 5.8027 | 0.01327   | 0.29416   | -12.067                    | -11.28 | -16.034  | -14.71 | -0.7895   | -1.32391  | BCC   | BCC |
| PtPdCrSiPb | 7.9092                    | 7.9525 | 6.2776   | 6.1528 | -0.04327  | 0.12476   | -4.1928                    | -5.375 | -11.491  | -10.26 | 1.18259   | -1.2312   | BCC   | BCC |
| PtPdCrSiP  | 7.6977                    | 7.6087 | 6.1097   | 5.7852 | 0.08904   | 0.3245    | -8.134                     | -7.821 | -9.0222  | -8.128 | -0.3128   | -0.89409  | BCC   | BCC |
| PtPdCrSiAs | 7.647                     | 7.4816 | 6.0694   | 5.7435 | 0.16538   | 0.32591   | -8.6746                    | -9.533 | -8.6588  | -8.573 | 0.85793   | -0.08573  | FCC   | FCC |



| HEAs       | Lattice parameters (Bohr) |        |          |        |           |           | $\Delta H_f$ (kJ/mol*f.u.) |        |          |        |           |           | Phase |     |
|------------|---------------------------|--------|----------|--------|-----------|-----------|----------------------------|--------|----------|--------|-----------|-----------|-------|-----|
|            | FCC Cal.                  | FCC ML | BCC Cal. | BCC ML | FCC error | BCC error | FCC Cal.                   | FCC ML | BCC Cal. | BCC ML | FCC error | BCC error | Cal.  | ML  |
| PtPdCrSiSb | 7.9064                    | 7.7692 | 6.2753   | 5.9963 | 0.13716   | 0.27898   | -9.8727                    | -11.35 | -17.073  | -14.98 | 1.47523   | -2.09672  | BCC   | BCC |
| PtPdCrGePb | 7.9835                    | 8.0476 | 6.3365   | 6.2771 | -0.06408  | 0.05943   | -0.913                     | -0.87  | -11.527  | -9.852 | -0.0435   | -1.67484  | BCC   | BCC |
| PtPdCrGeP  | 7.7761                    | 7.6745 | 6.1719   | 5.8364 | 0.10161   | 0.33551   | -10.557                    | -8.184 | -7.2601  | -8.345 | -2.3732   | 1.084837  | FCC   | BCC |
| PtPdCrGeAs | 7.7264                    | 7.5492 | 6.1324   | 5.8053 | 0.17718   | 0.32713   | -13.511                    | -10.56 | -11.164  | -10.84 | -2.9556   | -0.32516  | FCC   | BCC |
| PtPdCrGeSb | 7.9807                    | 7.9081 | 6.3343   | 6.1694 | 0.07261   | 0.16489   | -9.486                     | -9.486 | -7.8297  | -8.156 | 0         | 0.326236  | FCC   | FCC |
| PtPdCrPbP  | 7.9985                    | 7.9851 | 6.3484   | 6.2132 | 0.0134    | 0.13521   | -8.4681                    | -9.963 | -12.565  | -11.63 | 1.49438   | -0.9307   | BCC   | BCC |
| PtPdCrPbAs | 7.9515                    | 7.9447 | 6.3111   | 6.1886 | 0.00682   | 0.12252   | -5.9909                    | -7.489 | -9.7701  | -8.723 | 1.49772   | -1.0468   | BCC   | BCC |
| PtPdCrPbSb | 8.1923                    | 8.2675 | 6.5022   | 6.442  | -0.07522  | 0.06022   | 4.16245                    | 4.5244 | -1.8188  | -2.021 | -0.362    | 0.20209   | BCC   | BCC |
| PtPdCrPAs  | 7.7424                    | 7.6244 | 6.1451   | 5.7495 | 0.11796   | 0.39562   | -10.264                    | -9.247 | -7.4608  | -7.244 | -1.0172   | -0.21731  | FCC   | FCC |
| PtPdCrPSb  | 7.9957                    | 7.86   | 6.3462   | 6.0392 | 0.1357    | 0.30699   | -9.6994                    | -9.797 | -12.552  | -13.08 | 0.09797   | 0.523016  | BCC   | BCC |
| PtPdCrAsSb | 7.9487                    | 7.8218 | 6.3089   | 5.9985 | 0.12688   | 0.31037   | -12.809                    | -11.54 | -13.167  | -14.47 | -1.2693   | 1.302273  | BCC   | BCC |
| PtPdNiSnSc | 7.8726                    | 7.837  | 6.2485   | 6.2236 | 0.03556   | 0.02486   | -1.1704                    | -0.967 | 6.2509   | 6.0688 | -0.2031   | 0.182064  | FCC   | FCC |
| PtPdNiSnTi | 7.6743                    | 7.6707 | 6.0911   | 6.1028 | 0.00357   | -0.01173  | -2.4526                    | -3.105 | -1.7285  | -1.82  | 0.65197   | 0.090975  | FCC   | FCC |
| PtPdNiSnV  | 7.5687                    | 7.5729 | 6.0073   | 6.025  | -0.00424  | -0.01775  | -3.2696                    | -3.892 | -3.7549  | -3.323 | 0.62278   | -0.43198  | BCC   | FCC |
| PtPdNiSnMn | 7.4982                    | 7.5276 | 5.9513   | 5.9648 | -0.02939  | -0.01347  | -1.3188                    | -1.127 | -0.9138  | -0.914 | -0.1916   | 0         | FCC   | FCC |
| PtPdNiSnZn | 7.6161                    | 7.6127 | 6.0449   | 6.0295 | 0.00339   | 0.01539   | -3.284                     | -3.252 | -2.176   | -2.365 | -0.0325   | 0.189216  | FCC   | FCC |
| PtPdNiSnY  | 8.0558                    | 8.0583 | 6.3939   | 6.378  | -0.00248  | 0.01591   | -3.846                     | -3.127 | 3.1383   | 2.7054 | -0.7192   | 0.432864  | FCC   | FCC |
| PtPdNiSnNb | 7.7242                    | 7.6932 | 6.1307   | 6.1198 | 0.03097   | 0.01088   | 0.55744                    | 0.4532 | -2.3809  | -2.357 | 0.10424   | -0.02357  | BCC   | BCC |
| PtPdNiSnTc | 7.6215                    | 7.6184 | 6.0492   | 6.0594 | 0.00314   | -0.01018  | -3.7094                    | -3.533 | -6.1605  | -5.452 | -0.1766   | -0.70873  | BCC   | BCC |
| PtPdNiSnCd | 7.8518                    | 7.795  | 6.232    | 6.2239 | 0.05678   | 0.00806   | 2.06004                    | 1.7458 | 1.8789   | 1.8066 | 0.31424   | 0.072264  | BCC   | FCC |
| PtPdNiSnHf | 7.8629                    | 7.8512 | 6.2408   | 6.2374 | 0.01171   | 0.00339   | -1.3887                    | -1.543 | -1.9155  | -2.152 | 0.1543    | 0.236753  | BCC   | BCC |
| PtPdNiSnTa | 7.7327                    | 7.7106 | 6.1374   | 6.1294 | 0.02208   | 0.00803   | -0.7283                    | -0.751 | -6.5168  | -5.667 | 0.02252   | -0.85002  | BCC   | BCC |
| PtPdNiSnRe | 7.6345                    | 7.6224 | 6.0595   | 6.0754 | 0.01209   | -0.0159   | 1.34895                    | 1.173  | 1.6211   | 1.7621 | 0.17595   | -0.14097  | FCC   | FCC |
| PtPdNiSnHg | 7.8937                    | 7.8843 | 6.2653   | 6.2986 | 0.00942   | -0.03335  | 0.80235                    | 0.6631 | 0.0038   | 0.0039 | 0.13925   | -7.8E-05  | BCC   | BCC |
| PtPdNiSnAl | 7.682                     | 7.746  | 6.0972   | 5.9736 | -0.06398  | 0.12363   | -7.8158                    | -7.041 | -8.4925  | -9.542 | -0.7745   | 1.049631  | BCC   | BCC |
| PtPdNiSnGa | 7.7282                    | 7.8115 | 6.1339   | 6.1263 | -0.08332  | 0.00756   | -6.4901                    | -6.979 | -10.987  | -11.81 | 0.4885    | 0.826959  | BCC   | BCC |
| PtPdNiSnTl | 8.0411                    | 7.9697 | 6.3822   | 6.385  | 0.07136   | -0.00281  | 5.74226                    | 6.7556 | 5.6371   | 5.4729 | -1.0133   | 0.164187  | BCC   | BCC |
| PtPdNiSnSi | 7.7956                    | 7.7297 | 6.1874   | 5.9399 | 0.06593   | 0.2475    | -13.068                    | -11.36 | -18.179  | -17.82 | -1.7045   | -0.35644  | BCC   | BCC |

| HEAs       | Lattice parameters (Bohr) |        |          |        |           |           | $\Delta H_f$ (kJ/mol*f.u.) |        |          |        |           |           | Phase |     |
|------------|---------------------------|--------|----------|--------|-----------|-----------|----------------------------|--------|----------|--------|-----------|-----------|-------|-----|
|            | FCC Cal.                  | FCC ML | BCC Cal. | BCC ML | FCC error | BCC error | FCC Cal.                   | FCC ML | BCC Cal. | BCC ML | FCC error | BCC error | Cal.  | ML  |
| PtPdNiSnGe | 7.8721                    | 7.8292 | 6.2481   | 6.1194 | 0.04288   | 0.12867   | -8.1541                    | -10.32 | -10.27   | -11.16 | 2.16754   | 0.893048  | BCC   | BCC |
| PtPdNiSnPb | 8.0893                    | 8.087  | 6.4205   | 6.4332 | 0.00229   | -0.01272  | 5.72193                    | 6.3577 | -0.6061  | -0.645 | -0.6358   | 0.038688  | BCC   | BCC |
| PtPdNiSnP  | 7.8875                    | 7.8323 | 6.2603   | 5.9448 | 0.05518   | 0.3155    | -13.076                    | -12.22 | -9.4161  | -8.639 | -0.8554   | -0.77747  | FCC   | FCC |
| PtPdNiSnAs | 7.8392                    | 7.7023 | 6.2219   | 5.9203 | 0.13685   | 0.30164   | -15.706                    | -12.56 | -12.596  | -10.86 | -3.1412   | -1.73739  | FCC   | FCC |
| PtPdNiSnSb | 8.0866                    | 8.0246 | 6.4183   | 6.3608 | 0.06195   | 0.0575    | 1.9458                     | 1.9458 | -3.696   | -3.422 | 0         | -0.27378  | BCC   | BCC |
| PtPdScTiV  | 7.6061                    | 7.5573 | 6.037    | 6.032  | 0.04878   | 0.00495   | -2.0894                    | -2.199 | 1.3415   | 1.4905 | 0.10997   | -0.14905  | FCC   | FCC |
| PtPdScTiMn | 7.5363                    | 7.5079 | 5.9816   | 5.9869 | 0.02843   | -0.00531  | -1.6473                    | -1.83  | -0.0201  | -0.02  | 0.18303   | -0.00059  | FCC   | FCC |
| PtPdScTiZn | 7.6531                    | 7.5583 | 6.0742   | 6.0718 | 0.09475   | 0.00243   | -10.555                    | -8.444 | -5.1435  | -5.591 | -2.1111   | 0.447264  | FCC   | FCC |
| PtPdScTiAl | 7.7184                    | 7.7638 | 6.1261   | 6.036  | -0.04544  | 0.09007   | -8.7906                    | -8.97  | -9.7261  | -10.13 | 0.1794    | 0.405256  | BCC   | BCC |
| PtPdScTiSi | 7.8309                    | 7.7006 | 6.2154   | 6.0355 | 0.13033   | 0.17991   | -12.76                     | -11.81 | -11.56   | -12.99 | -0.9452   | 1.42879   | FCC   | BCC |
| PtPdScTiSb | 8.1194                    | 8.0249 | 6.4444   | 6.3883 | 0.09447   | 0.05605   | -3.6006                    | -3.104 | 5.904    | 5.7882 | -0.4966   | 0.115764  | FCC   | FCC |
| PtPdScVMn  | 7.4267                    | 7.4011 | 5.8946   | 5.9076 | 0.02563   | -0.013    | -1.3237                    | -1.261 | 1.4246   | 1.5318 | -0.063    | -0.10723  | FCC   | FCC |
| PtPdScVZn  | 7.5468                    | 7.4859 | 5.9899   | 5.9933 | 0.06094   | -0.00337  | -7.2875                    | -7.921 | -3.9162  | -3.435 | 0.6337    | -0.48094  | FCC   | FCC |
| PtPdScVAl  | 7.614                     | 7.6862 | 6.0432   | 5.9291 | -0.07222  | 0.11412   | -11.06                     | -9.141 | -9.1806  | -9.001 | -1.9195   | -0.18001  | FCC   | FCC |
| PtPdScVSi  | 7.7296                    | 7.6489 | 6.135    | 5.9363 | 0.08068   | 0.19867   | -9.4498                    | -12.12 | -12.908  | -11.63 | 2.66532   | -1.27915  | BCC   | FCC |
| PtPdScVSb  | 8.0252                    | 7.965  | 6.3696   | 6.3122 | 0.06022   | 0.05742   | -2.7352                    | -2.82  | 5.5631   | 6.0469 | 0.08459   | -0.48375  | FCC   | FCC |
| PtPdScMnZn | 7.476                     | 7.4224 | 5.9337   | 5.9532 | 0.05358   | -0.01951  | -6.0434                    | -5.925 | -6.9339  | -7.299 | -0.1185   | 0.36494   | BCC   | BCC |
| PtPdScMnAl | 7.5444                    | 7.6236 | 5.988    | 5.913  | -0.07923  | 0.07497   | -8.9332                    | -8.758 | -7.438   | -6.701 | -0.1752   | -0.7371   | FCC   | FCC |
| PtPdScMnSi | 7.6621                    | 7.5784 | 6.0814   | 5.8949 | 0.08367   | 0.18649   | -9.6745                    | -10.52 | -9.9447  | -11.3  | 0.84126   | 1.356096  | BCC   | BCC |
| PtPdScMnSb | 7.9627                    | 7.8278 | 6.32     | 6.2607 | 0.13485   | 0.05926   | -1.9726                    | -2.076 | 3.4827   | 3.4482 | 0.10382   | 0.034482  | FCC   | FCC |
| PtPdScZnAl | 7.6609                    | 7.6113 | 6.0804   | 5.972  | 0.04955   | 0.10842   | -6.5897                    | -8.786 | -9.8106  | -10.01 | 2.19655   | 0.200216  | BCC   | BCC |
| PtPdScZnSi | 7.7751                    | 7.5486 | 6.1711   | 5.9661 | 0.22648   | 0.20498   | -10.816                    | -11.04 | -11.263  | -11.98 | 0.22073   | 0.71892   | BCC   | BCC |
| PtPdScZnSb | 8.0675                    | 7.8284 | 6.4031   | 6.3353 | 0.23905   | 0.06784   | -1.5885                    | -1.346 | -0.4505  | -0.442 | -0.2423   | -0.00883  | FCC   | FCC |
| PtPdScAlSi | 7.8384                    | 7.8359 | 6.2213   | 5.8734 | 0.00247   | 0.34792   | -13.125                    | -12.15 | -10.412  | -11.97 | -0.9722   | 1.555879  | FCC   | FCC |
| PtPdScAlSb | 8.1263                    | 8.0683 | 6.4499   | 6.3384 | 0.058     | 0.11145   | -11.281                    | -9.642 | 0.1859   | 0.1999 | -1.6391   | -0.01399  | FCC   | FCC |
| PtPdScSiSb | 8.0281                    | 7.9482 | 6.5306   | 6.3174 | 0.07985   | 0.21321   | -14.249                    | -11.58 | -2.2132  | -2.088 | -2.6644   | -0.12527  | FCC   | FCC |
| PtPdTiVMn  | 7.2028                    | 7.2177 | 5.7169   | 5.7811 | -0.0149   | -0.06424  | -10.081                    | -10.61 | -7.455   | -6.427 | 0.53056   | -1.02827  | FCC   | FCC |
| PtPdTiVZn  | 7.3303                    | 7.3651 | 5.8181   | 5.8705 | -0.03481  | -0.05244  | -6.877                     | -8.931 | -9.2226  | -9.607 | 2.05418   | 0.384276  | BCC   | BCC |

| HEAs       | Lattice parameters (Bohr) |        |          |        |           |           | $\Delta H_f$ (kJ/mol*f.u.) |        |          |        |           |           | Phase |     |
|------------|---------------------------|--------|----------|--------|-----------|-----------|----------------------------|--------|----------|--------|-----------|-----------|-------|-----|
|            | FCC Cal.                  | FCC ML | BCC Cal. | BCC ML | FCC error | BCC error | FCC Cal.                   | FCC ML | BCC Cal. | BCC ML | FCC error | BCC error | Cal.  | ML  |
| PtPdTiVAl  | 7.4014                    | 7.594  | 5.8745   | 5.7689 | -0.1926   | 0.10559   | -8.9912                    | -9.366 | -8.4737  | -8.736 | 0.37463   | 0.262074  | FCC   | FCC |
| PtPdTiVSi  | 7.5236                    | 7.5556 | 5.9715   | 5.8396 | -0.03202  | 0.13187   | -11.784                    | -11.12 | -7.1928  | -8.268 | -0.667    | 1.074788  | FCC   | FCC |
| PtPdTiVSb  | 7.8347                    | 7.7663 | 6.2184   | 6.1847 | 0.06838   | 0.03369   | -7.7885                    | -7.636 | -8.3874  | -8.647 | -0.1527   | 0.259404  | BCC   | BCC |
| PtPdTiMnZn | 7.2551                    | 7.3214 | 5.7584   | 5.8041 | -0.06628  | -0.04571  | -7.9752                    | -8.764 | -12.874  | -13.41 | 0.78876   | 0.536424  | BCC   | BCC |
| PtPdTiMnAl | 7.3277                    | 7.5431 | 5.816    | 5.7413 | -0.21542  | 0.07468   | -6.7819                    | -8.924 | -9.1431  | -10.63 | 2.14164   | 1.48841   | BCC   | BCC |
| PtPdTiMnSi | 7.4523                    | 7.4907 | 5.9149   | 5.7904 | -0.03843  | 0.12447   | -7.8025                    | -10.13 | -10.872  | -10.56 | 2.33061   | -0.31666  | BCC   | BCC |
| PtPdTiMnSb | 7.769                     | 7.6747 | 6.1663   | 6.1366 | 0.09429   | 0.02965   | -4.4285                    | -5.905 | -7.6525  | -6.713 | 1.47615   | -0.93978  | BCC   | BCC |
| PtPdTiZnAl | 7.451                     | 7.5246 | 5.9138   | 5.8336 | -0.07362  | 0.08024   | -7.5792                    | -8.613 | -13.41   | -11.76 | 1.03352   | -1.64679  | BCC   | BCC |
| PtPdTiZnSi | 7.5716                    | 7.4429 | 6.0096   | 5.8756 | 0.12868   | 0.13396   | -10.031                    | -10.13 | -8.8258  | -10.38 | 0.10132   | 1.557495  | FCC   | BCC |
| PtPdTiZnSb | 7.879                     | 7.7151 | 6.2535   | 6.2053 | 0.16387   | 0.04824   | -6.8241                    | -8.53  | -7.4128  | -6.864 | 1.70602   | -0.5491   | BCC   | FCC |
| PtPdTiAlSi | 7.6383                    | 7.8021 | 6.0625   | 5.8024 | -0.16382  | 0.26011   | -11.436                    | -11.21 | -11.438  | -11.21 | -0.2242   | -0.22427  | BCC   | BCC |
| PtPdTiAlSb | 7.9406                    | 7.8656 | 6.3025   | 6.1342 | 0.07503   | 0.16828   | -12.441                    | -11.21 | -12.405  | -12.41 | -1.2329   | 0         | FCC   | BCC |
| PtPdTiSiSb | 8.0471                    | 7.8145 | 6.387    | 6.1283 | 0.23261   | 0.25869   | -8.8106                    | -11.75 | -15.107  | -15.11 | 2.93685   | 0         | BCC   | BCC |
| PtPdVMnZn  | 7.1366                    | 7.2025 | 5.6644   | 5.715  | -0.06586  | -0.05064  | -10.28                     | -9.179 | -12.484  | -12.61 | -1.1015   | 0.1261    | BCC   | BCC |
| PtPdVMnAl  | 7.2116                    | 7.4651 | 5.7239   | 5.6682 | -0.2535   | 0.05565   | -8.2612                    | -9.179 | -10.669  | -10.07 | 0.91791   | -0.60391  | BCC   | BCC |
| PtPdVMnSi  | 7.3401                    | 7.4412 | 5.8259   | 5.7364 | -0.10107  | 0.08946   | -8.6738                    | -10.09 | -10.548  | -9.951 | 1.41201   | -0.59708  | BCC   | FCC |
| PtPdVMnSb  | 7.666                     | 7.61   | 6.0845   | 6.0587 | 0.05599   | 0.0258    | -6.168                     | -6.047 | -7.8146  | -7.169 | -0.1209   | -0.64525  | BCC   | BCC |
| PtPdVZnAl  | 7.3388                    | 7.4622 | 5.8248   | 5.7716 | -0.12341  | 0.0532    | -11.084                    | -9.011 | -11.94   | -11.71 | -2.0726   | -0.23412  | BCC   | BCC |
| PtPdVZnSi  | 7.463                     | 7.3815 | 5.9234   | 5.8217 | 0.08151   | 0.1017    | -9.3172                    | -10.24 | -10.332  | -10.76 | 0.92148   | 0.430516  | BCC   | BCC |
| PtPdVZnSb  | 7.7789                    | 7.6404 | 6.1741   | 6.129  | 0.13848   | 0.0451    | -7.8028                    | -7.576 | -8.8303  | -8.331 | -0.2273   | -0.49983  | BCC   | BCC |
| PtPdVAlSi  | 7.5317                    | 7.8007 | 5.9779   | 5.7555 | -0.26905  | 0.22237   | -8.9187                    | -11.01 | -11.52   | -10.19 | 2.09205   | -1.32532  | BCC   | FCC |
| PtPdVAlSb  | 7.8421                    | 7.8174 | 6.2243   | 6.0467 | 0.02472   | 0.17759   | -13.002                    | -11.02 | -13.044  | -12.19 | -1.9834   | -0.85331  | BCC   | BCC |
| PtPdVSiSb  | 7.9512                    | 7.7763 | 6.3109   | 6.0403 | 0.17493   | 0.2706    | -9.9179                    | -11.81 | -17.153  | -15.45 | 1.88912   | -1.6999   | BCC   | BCC |
| PtPdMnZnAl | 7.2638                    | 7.3895 | 5.7653   | 5.7128 | -0.12571  | 0.05248   | -7.1796                    | -8.447 | -14.238  | -12.38 | 1.26699   | -1.85715  | BCC   | BCC |
| PtPdMnZnSi | 7.3905                    | 7.3196 | 5.8659   | 5.7743 | 0.07093   | 0.09157   | -10.252                    | -9.236 | -11.191  | -13.48 | -1.016    | 2.292042  | BCC   | BCC |
| PtPdMnZnSb | 7.7122                    | 7.6372 | 6.1212   | 6.0685 | 0.07504   | 0.05271   | -5.2222                    | -5.739 | -7.9486  | -8.456 | 0.51648   | 0.50736   | BCC   | BCC |
| PtPdMnAlSi | 7.4605                    | 7.7344 | 5.9214   | 5.7442 | -0.27391  | 0.1772    | -12.148                    | -9.877 | -13.741  | -13.34 | -2.2716   | -0.40023  | BCC   | BCC |
| PtPdMnAlSb | 7.7766                    | 7.7524 | 6.1723   | 6.034  | 0.02416   | 0.13826   | -8.7308                    | -10.04 | -9.1064  | -9.792 | 1.3046    | 0.685426  | BCC   | FCC |

| HEAs       | Lattice parameters (Bohr) |        |          |        |           |           | $\Delta H_f$ (kJ/mol*f.u.) |        |          |        |           |           | Phase |     |
|------------|---------------------------|--------|----------|--------|-----------|-----------|----------------------------|--------|----------|--------|-----------|-----------|-------|-----|
|            | FCC Cal.                  | FCC ML | BCC Cal. | BCC ML | FCC error | BCC error | FCC Cal.                   | FCC ML | BCC Cal. | BCC ML | FCC error | BCC error | Cal.  | ML  |
| PtPdMnSiSb | 7.8875                    | 7.724  | 6.2603   | 6.0183 | 0.16348   | 0.242     | -7.9097                    | -10.55 | -19.017  | -18.46 | 2.63655   | -0.5539   | BCC   | BCC |
| PtPdZnAlSi | 7.5795                    | 7.6425 | 6.0159   | 5.8116 | -0.06296  | 0.20429   | -10.928                    | -9.671 | -14.593  | -15.04 | -1.2572   | 0.451326  | BCC   | BCC |
| PtPdZnAlSb | 7.8863                    | 7.7219 | 6.2594   | 6.0786 | 0.16443   | 0.18078   | -8.9444                    | -9.829 | -9.5321  | -9.827 | 0.88461   | 0.294807  | BCC   | FCC |
| PtPdZnSiSb | 7.9943                    | 7.7248 | 6.345    | 6.0735 | 0.26945   | 0.27154   | -10.051                    | -9.951 | -19.786  | -18.32 | -0.0995   | -1.46562  | BCC   | BCC |
| PtPdAlSiSb | 8.0542                    | 8.0076 | 5.9259   | 5.9475 | 0.04656   | -0.0216   | -9.6707                    | -10.87 | -22.958  | -20.5  | 1.19525   | -2.45974  | BCC   | BCC |

## References

1. Troparevsky, M.C., et al., *Beyond atomic sizes and Hume-Rothery rules: understanding and predicting high-entropy alloys*. Jom, 2015. **67**(10): p. 2350-2363.
2. Hu, Y., et al., *First-principle calculation investigation of NbMoTaW based refractory high entropy alloys*. Journal of Alloys and Compounds, 2020. **827**: p. 153963.
3. Akai, H., *Fast Korringa-Kohn-Rostoker coherent potential approximation and its application to FCC Ni-Fe systems*. Journal of Physics: Condensed Matter, 1989. **1**(43): p. 8045.
4. Akai, H. *AkaiKKR (MACHIKANEYAMA)*. Available from: <http://kkk.issp.u-tokyo.ac.jp>.
5. Huang, E.-W., et al., *Machine-learning and high-throughput studies for high-entropy materials*. Materials Science and Engineering: R: Reports, 2022. **147**: p. 100645.
6. Lucas, M., et al., *Absence of long-range chemical ordering in equimolar FeCoCrNi*. Applied Physics Letters, 2012. **100**(25): p. 251907.
7. Zhang, Y., X. Yang, and P. Liaw, *Alloy design and properties optimization of high-entropy alloys*. Jom, 2012. **64**(7): p. 830-838.
8. Lucas, M., et al., *Magnetic and vibrational properties of high-entropy alloys*. Journal of Applied Physics, 2011. **109**(7): p. 07E307.
9. Wu, Z., et al., *Recovery, recrystallization, grain growth and phase stability of a family of FCC-structured multi-component equiatomic solid solution alloys*. Intermetallics, 2014. **46**: p. 131-140.
10. Cantor, B., et al., *Microstructural development in equiatomic multi-component alloys*. Materials Science and Engineering: A, 2004. **375**: p. 213-218.
11. Senkov, O., et al., *Refractory high-entropy alloys*. Intermetallics, 2010. **18**(9): p. 1758-1765.
12. Senkov, O.N., et al., *Mechanical properties of Nb<sub>25</sub>Mo<sub>25</sub>Ta<sub>25</sub>W<sub>25</sub> and V<sub>20</sub>Nb<sub>20</sub>Mo<sub>20</sub>Ta<sub>20</sub>W<sub>20</sub> refractory high entropy alloys*. Intermetallics, 2011. **19**(5): p. 698-706.
13. Yeh, J.-W., et al., *Formation of simple crystal structures in Cu-Co-Ni-Cr-Al-Fe-Ti-V alloys with multiprincipal metallic elements*. Metallurgical and Materials Transactions A, 2004. **35**(8): p. 2533-2536.
14. Senkov, O., et al., *Microstructure and elevated temperature properties of a refractory TaNbHfZrTi alloy*. Journal of Materials Science, 2012. **47**(9): p. 4062-4074.
